# Supplementary material for: Mechanistic Investigation of the Pyrolysis of Brown Grease
Source: Hindawi journal article supplement (doi:10.1155/2020/8844225), 2020-12-22
Supplement: f1 [file 8844225.f1.pdf]

# Supporting Information

## Mechanistic Investigation of the Pyrolysis of Brown Grease

**Mansour H. Almatarneh,<sup>a,b,\*</sup> Imarat Y. Alnemrat,<sup>c</sup> Reema A. Omeir,<sup>a</sup>  
Lawrence M. Pratt<sup>d</sup>, Thi Xuan Thi Luu<sup>e</sup>, Minh Bui<sup>e</sup>, Dickens Saint Hilaire<sup>f</sup>**

<sup>a</sup> Department of Chemistry, University of Jordan, Amman 11942, Jordan

<sup>b</sup> Department of Chemistry, Memorial University, St. John's, NL A1B, Canada

<sup>c</sup> Department of Chemistry, Yarmouk University, Irbid 21163, Jordan

<sup>d</sup> Department of Chemistry and Environmental Science, Medgar Evers College, The City University of New York, 1638 Bedford Ave., Brooklyn, NY 11225, United States

<sup>e</sup> Department of Organic Chemistry, Ho Chi Minh University of Science, Ho Chi Minh City, Vietnam

<sup>f</sup> Department of Chemistry and Chemical Technology, Bronx Community College, The City University of New York, NY 11225, United States

\*Corresponding author: Mansour H. Almatarneh, [m.almatarneh@ju.edu.jo](mailto:m.almatarneh@ju.edu.jo), (+962) 65355000-Ext. 22162.

## Contents:

- **Figure S1.** Shows the conformers for Palmitic Acid.
- Reactants, intermediates, transition states and products for the Pyrolysis of brown grease reaction for pathway **A** at B3LYP/6-31G(d) and M062x/6-31D(d) and for pathway **B** at uB3LYP/6-31G(d) level of theory.

**Figure S1.** Conformers for Palmitic Acid. The most stable conformer is R1.

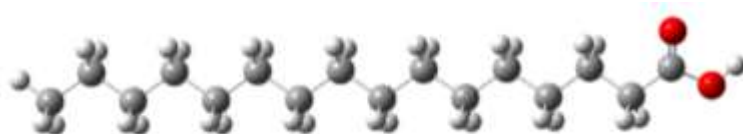

**R1**

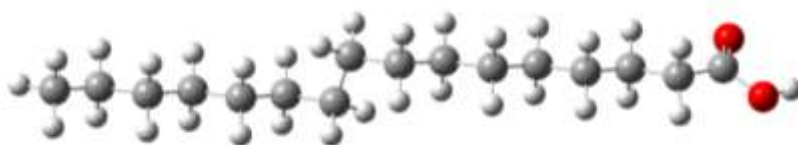

**R2**

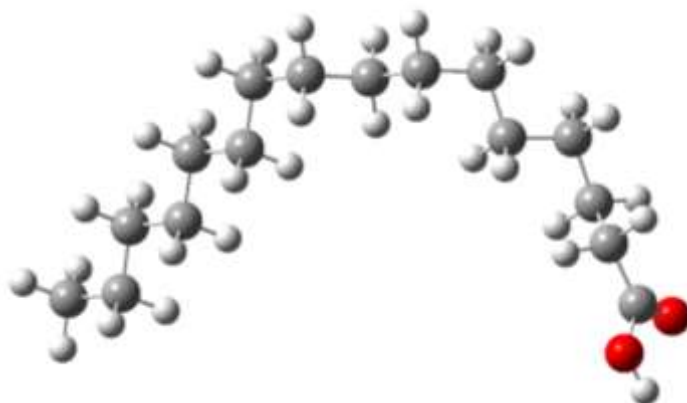

**R3**

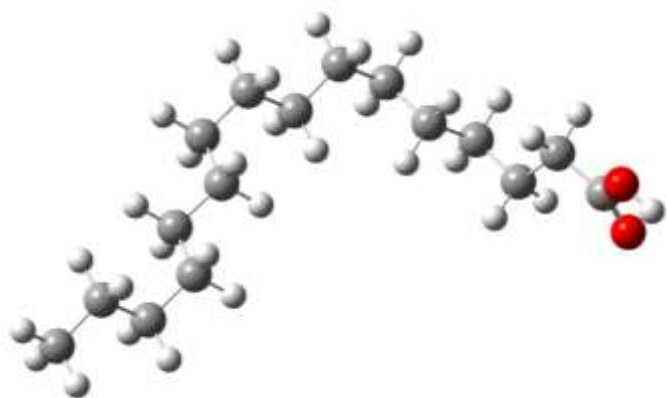

**R4**

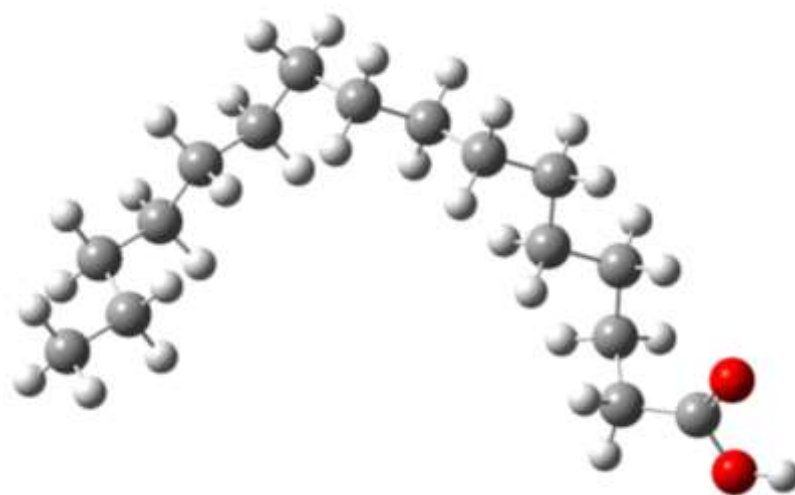

**R5**

## Coordinates

### The pyrolysis reaction: (Pathway A1) (Reactant RA1)

Basis set = 6-31G(d)

Nuclear repulsion energy= 1185.396506 Hartrees

E(RB3LYP) = -779.448022 Hartrees

Formula: C16H32O2

Cartesian:

|   |             |             |             |
|---|-------------|-------------|-------------|
| C | -8.61542800 | 0.06157600  | 0.09378500  |
| O | -9.40409200 | -0.17841300 | 0.98096200  |
| O | -8.79733100 | 1.09004100  | -0.77796000 |
| H | -9.63005000 | 1.52200700  | -0.50961600 |
| C | -7.33167000 | -0.68631600 | -0.18519700 |
| H | -7.33429300 | -1.00335400 | -1.23575000 |
| H | -7.33550400 | -1.58126200 | 0.44310300  |
| C | -6.07668500 | 0.16710500  | 0.08817300  |
| H | -6.10892900 | 1.06467500  | -0.54130800 |
| H | -6.09712300 | 0.51315200  | 1.13060900  |
| C | -4.77648600 | -0.60425000 | -0.16989100 |
| H | -4.75812700 | -1.50772900 | 0.45702600  |
| H | -4.76401600 | -0.95593300 | -1.21216600 |
| C | -3.51637500 | 0.22792900  | 0.10092800  |
| H | -3.53713600 | 1.13197500  | -0.52539600 |
| H | -3.53132300 | 0.58006500  | 1.14293900  |
| C | -2.21212600 | -0.53791000 | -0.15662900 |
| H | -2.19813900 | -0.89093700 | -1.19853700 |
| H | -2.19250200 | -1.44204100 | 0.46986300  |
| C | -0.95093100 | 0.29288800  | 0.11349800  |
| H | -0.96575200 | 0.64671400  | 1.15513000  |
| H | -0.97060500 | 1.19674800  | -0.51347000 |
| C | 0.35377100  | -0.47262500 | -0.14254300 |
| H | 0.36822000  | -0.82701800 | -1.18404200 |
| H | 0.37328000  | -1.37627500 | 0.48477200  |
| C | 1.61524600  | 0.35795700  | 0.12699600  |
| H | 1.60028100  | 0.71299600  | 1.16826400  |
| H | 1.59598900  | 1.26127500  | -0.50083600 |
| C | 2.92005300  | -0.40779700 | -0.12782100 |
| H | 2.93487100  | -0.76315200 | -1.16900400 |
| H | 2.93921900  | -1.31096800 | 0.50023200  |
| C | 4.18166800  | 0.42266100  | 0.14144600  |
| H | 4.16651400  | 0.77848600  | 1.18246000  |
| H | 4.16278900  | 1.32556600  | -0.48701500 |
| C | 5.48643400  | -0.34346000 | -0.11245900 |
| H | 5.50155700  | -0.69939100 | -1.15344200 |
| H | 5.50519400  | -1.24631400 | 0.51606600  |
| C | 6.74819100  | 0.48677500  | 0.15678900  |
| H | 6.73285300  | 0.84298100  | 1.19770700  |
| H | 6.72962300  | 1.38949300  | -0.47200400 |
| C | 8.05294800  | -0.27924400 | -0.09642900 |

|   |             |             |             |
|---|-------------|-------------|-------------|
| H | 8.06946100  | -0.63551400 | -1.13742300 |
| H | 8.07254200  | -1.18211500 | 0.53229600  |
| C | 9.31499500  | 0.55041800  | 0.17285000  |
| H | 9.29910500  | 0.90585800  | 1.21308500  |
| H | 9.29610000  | 1.45215800  | -0.45579100 |
| C | 10.61311200 | -0.22235300 | -0.08243000 |
| H | 10.67464600 | -0.56080100 | -1.12418500 |
| H | 11.49484700 | 0.39686200  | 0.11883100  |
| H | 10.67749300 | -1.11136000 | 0.55717600  |

\*\*\*\*\*

**The pyrolysis reaction: (Pathway A1) (Transition state, TS Ketene, TSA1)**

Basis set = 6-31G(d)

Nuclear repulsion energy= 1183.845617 Hartrees

E(RB3LYP) = -779.318052 Hartrees

Formula: C16H32O2

Cartesian:

|   |             |             |             |
|---|-------------|-------------|-------------|
| C | -8.60993200 | -0.09546600 | 0.05098400  |
| O | -9.75996100 | -0.28959600 | 0.17529500  |
| O | -8.10589400 | 1.68996100  | 0.02298200  |
| H | -8.83835900 | 2.12484900  | -0.44982800 |
| C | -7.35022500 | -0.47571900 | -0.45802600 |
| H | -7.50693400 | 0.91749600  | -0.77047100 |
| H | -7.41354500 | -1.41294900 | -1.01709400 |
| C | -6.09202500 | -0.34923300 | 0.41519300  |
| H | -6.15646200 | 0.55850800  | 1.02464900  |
| H | -6.04110000 | -1.19517000 | 1.11667600  |
| C | -4.81159700 | -0.31833800 | -0.42947100 |
| H | -4.78269100 | -1.20377600 | -1.08173200 |
| H | -4.84398400 | 0.55259900  | -1.09897500 |
| C | -3.53481500 | -0.27078700 | 0.41901400  |
| H | -3.50912400 | -1.14402300 | 1.08777300  |
| H | -3.56734100 | 0.61224800  | 1.07423500  |
| C | -2.24822600 | -0.23506800 | -0.41609600 |
| H | -2.21697800 | -1.11747300 | -1.07253100 |
| H | -2.27359600 | 0.63860800  | -1.08413700 |
| C | -0.96964500 | -0.18820500 | 0.43052400  |
| H | -0.94447500 | -1.06204800 | 1.09857100  |
| H | -1.00155600 | 0.69388400  | 1.08725100  |
| C | 0.31723300  | -0.15174200 | -0.40399300 |
| H | 0.34883300  | -1.03370600 | -1.06105200 |
| H | 0.29191600  | 0.72222000  | -1.07187900 |
| C | 1.59609800  | -0.10505700 | 0.44226200  |
| H | 1.62137500  | -0.97905500 | 1.11013200  |
| H | 1.56435200  | 0.77681400  | 1.09938700  |
| C | 2.88306700  | -0.06835900 | -0.39211600 |
| H | 2.91468000  | -0.95016800 | -1.04938600 |
| H | 2.85777100  | 0.80571600  | -1.05988800 |
| C | 4.16200300  | -0.02183500 | 0.45404000  |
| H | 4.18727800  | -0.89591700 | 1.12181200  |
| H | 4.13035200  | 0.85994800  | 1.11132000  |

|   |             |             |             |
|---|-------------|-------------|-------------|
| C | 5.44898100  | 0.01491500  | -0.38031600 |
| H | 5.48057900  | -0.86684200 | -1.03764900 |
| H | 5.42370500  | 0.88902700  | -1.04804200 |
| C | 6.72796300  | 0.06136500  | 0.46576100  |
| H | 6.75319200  | -0.81275200 | 1.13353800  |
| H | 6.69635400  | 0.94316800  | 1.12307200  |
| C | 8.01501200  | 0.09806500  | -0.36816500 |
| H | 8.04775200  | -0.78373800 | -1.02561300 |
| H | 7.99089700  | 0.97222800  | -1.03610100 |
| C | 9.29420200  | 0.14455100  | 0.47748700  |
| H | 9.31888200  | -0.72909000 | 1.14444400  |
| H | 9.26213400  | 1.02597100  | 1.13381000  |
| C | 10.57452100 | 0.18087100  | -0.36328100 |
| H | 11.46908600 | 0.21369300  | 0.26923500  |
| H | 10.65270500 | -0.70559500 | -1.00488900 |
| H | 10.59545600 | 1.06265900  | -1.01566600 |

\*\*\*\*\*

**The pyrolysis reaction: (Pathway A1) (ketene product)**

Basis set = 6-31G(d)

Nuclear repulsion energy= 1220.629988 Hartrees

E(RB3LYP) = -779.321731 Hartrees

Formula: C16H32O2

Cartesian:

|   |             |             |             |
|---|-------------|-------------|-------------|
| C | 7.85595000  | 0.40868900  | 0.45929500  |
| O | 7.99339800  | 1.52354800  | 0.82128800  |
| O | 5.95253500  | 2.82367100  | -0.96581300 |
| H | 6.81080300  | 2.69569200  | -0.52940900 |
| C | 7.69866600  | -0.83010900 | 0.05587600  |
| H | 5.38540000  | 3.14894300  | -0.25073300 |
| H | 8.61130700  | -1.39448500 | -0.11757300 |
| C | 6.34589100  | -1.46778600 | -0.21750100 |
| H | 6.28527100  | -2.41351700 | 0.33954600  |
| H | 6.29645600  | -1.73633800 | -1.28266300 |
| C | 5.14664400  | -0.57930100 | 0.13966400  |
| H | 5.17331600  | -0.35751900 | 1.21685900  |
| H | 5.23631400  | 0.38342500  | -0.38270500 |
| C | 3.80263300  | -1.23007300 | -0.21009500 |
| H | 3.77691700  | -1.45133400 | -1.28714100 |
| H | 3.71912900  | -2.19966700 | 0.30343200  |
| C | 2.59454800  | -0.35747400 | 0.15453800  |
| H | 2.68165200  | 0.61163600  | -0.35813500 |
| H | 2.61883800  | -0.13591000 | 1.23205700  |
| C | 1.24693500  | -0.99939500 | -0.19959500 |
| H | 1.22284800  | -1.22061300 | -1.27697100 |
| H | 1.16144800  | -1.97022200 | 0.31111800  |
| C | 0.03842200  | -0.12743700 | 0.16502200  |
| H | 0.12461200  | 0.84335300  | -0.34540100 |
| H | 0.06235900  | 0.09384900  | 1.24258000  |
| C | -1.30970500 | -0.76791700 | -0.19012400 |

|   |              |             |             |
|---|--------------|-------------|-------------|
| H | -1.33357700  | -0.98896500 | -1.26763600 |
| H | -1.39579900  | -1.73904800 | 0.31988600  |
| C | -2.51822200  | 0.10408400  | 0.17443700  |
| H | -2.43178500  | 1.07524000  | -0.33536400 |
| H | -2.49444500  | 0.32503800  | 1.25204000  |
| C | -3.86648200  | -0.53583200 | -0.18124900 |
| H | -3.89019400  | -0.75672300 | -1.25883000 |
| H | -3.95297700  | -1.50707500 | 0.32847600  |
| C | -5.07492300  | 0.33632500  | 0.18318000  |
| H | -4.98822100  | 1.30758600  | -0.32640300 |
| H | -5.05130700  | 0.55712200  | 1.26080600  |
| C | -6.42327000  | -0.30320800 | -0.17283900 |
| H | -6.44679500  | -0.52404800 | -1.25047400 |
| H | -6.51005500  | -1.27449300 | 0.33680800  |
| C | -7.63174300  | 0.56876100  | 0.19120400  |
| H | -7.54595100  | 1.54029200  | -0.31833300 |
| H | -7.60938900  | 0.78979600  | 1.26894800  |
| C | -8.98030000  | -0.07018000 | -0.16481300 |
| H | -9.00316900  | -0.29045800 | -1.24167600 |
| H | -9.06667600  | -1.04049200 | 0.34483500  |
| C | -10.18140700 | 0.80745500  | 0.20197400  |
| H | -10.14179700 | 1.77170500  | -0.31979000 |
| H | -11.12813300 | 0.32362500  | -0.06453300 |
| H | -10.20569400 | 1.01624500  | 1.27873800  |

\*\*\*\*\*

**The pyrolysis reaction: (Pathway A) (ketene + palmitic acid)**

Basis set = 6-31G(d)

Nuclear repulsion energy= 3146.523687 Hartrees

E(RB3LYP) = -1482.477464 Hartrees

Formula: C32H62O3

Cartesian:

|   |             |            |             |
|---|-------------|------------|-------------|
| C | -0.42494400 | 7.36583600 | -2.01118800 |
| O | -0.74161100 | 8.35626900 | -1.44945600 |
| C | -0.07329900 | 6.27275000 | -2.64310900 |
| H | -0.02622300 | 6.33714400 | -3.72748800 |
| C | 0.27775000  | 4.97391500 | -1.93595200 |
| H | 0.00193100  | 5.05275700 | -0.88000800 |
| H | -0.34734900 | 4.17430800 | -2.35786500 |
| C | -2.65645700 | 6.84818600 | 1.01194600  |
| O | -1.75846700 | 6.12314500 | 0.62615500  |
| O | -2.90670500 | 8.05865300 | 0.47795600  |
| H | -2.23568200 | 8.22274500 | -0.22039200 |
| C | -3.60451100 | 6.53447400 | 2.15341800  |
| H | -4.61385600 | 6.84485000 | 1.85617400  |
| H | -3.32366200 | 7.19914500 | 2.98248300  |
| C | -3.57187300 | 5.06924400 | 2.59912000  |
| H | -4.10471600 | 4.98596600 | 3.55576100  |
| H | -2.53105200 | 4.78093800 | 2.78924900  |
| C | 1.76072800  | 4.59089400 | -2.07628400 |

|   |             |             |             |
|---|-------------|-------------|-------------|
| H | 2.02744900  | 4.54271700  | -3.14220300 |
| H | 2.37906300  | 5.38821700  | -1.64214100 |
| C | 2.09179000  | 3.25209700  | -1.40404500 |
| H | 1.46271700  | 2.46105300  | -1.83894900 |
| H | 1.82001100  | 3.30459100  | -0.33955600 |
| C | 3.56776500  | 2.85319500  | -1.53233600 |
| H | 3.83847500  | 2.79939100  | -2.59738600 |
| H | 4.19647800  | 3.64536500  | -1.09954400 |
| C | 3.90057600  | 1.51656400  | -0.85666200 |
| H | 3.62972500  | 1.57149400  | 0.20821400  |
| H | 3.27059100  | 0.72467100  | -1.28860700 |
| C | 5.37592800  | 1.11524400  | -0.98364500 |
| H | 5.64642700  | 1.05823200  | -2.04862200 |
| H | 6.00595800  | 1.90805400  | -0.55353000 |
| C | 5.70840900  | -0.21970100 | -0.30454700 |
| H | 5.07761900  | -1.01234900 | -0.73396700 |
| H | 5.43814100  | -0.16193600 | 0.76041200  |
| C | 7.18334600  | -0.62269500 | -0.43102500 |
| H | 7.45339400  | -0.68224300 | -1.49597600 |
| H | 7.81425800  | 0.17056800  | -0.00297300 |
| C | 7.51523400  | -1.95640800 | 0.25077400  |
| H | 6.88387200  | -2.74957400 | -0.17685100 |
| H | 7.24529400  | -1.89636100 | 1.31571200  |
| C | 8.98990000  | -2.36049800 | 0.12470500  |
| H | 9.25971400  | -2.42178000 | -0.94020200 |
| H | 9.62135400  | -1.56694300 | 0.55142300  |
| C | 9.32135400  | -3.69337900 | 0.80832700  |
| H | 8.68966500  | -4.48690100 | 0.38177900  |
| H | 9.05150800  | -3.63180700 | 1.87323600  |
| C | 10.79564300 | -4.09835800 | 0.68284200  |
| H | 11.06633200 | -4.16119900 | -0.38189700 |
| H | 11.42827600 | -3.30533100 | 1.10916700  |
| C | 11.12725600 | -5.43076400 | 1.36719000  |
| H | 10.49584600 | -6.22340000 | 0.94087300  |
| H | 10.85753400 | -5.36791600 | 2.43114100  |
| C | 12.60139000 | -5.82755800 | 1.23717000  |
| H | 12.80544300 | -6.78211200 | 1.73576200  |
| H | 12.89220500 | -5.93283100 | 0.18458200  |
| H | 13.25668200 | -5.07072000 | 1.68592100  |
| C | -4.19333400 | 4.10016000  | 1.58451700  |
| H | -5.23448700 | 4.39830400  | 1.38814800  |
| H | -3.65759300 | 4.18728500  | 0.63065000  |
| C | -4.16458100 | 2.63934300  | 2.05135500  |
| H | -4.69166600 | 2.55275600  | 3.01352300  |
| H | -3.12349300 | 2.34351900  | 2.24775400  |
| C | -4.78652500 | 1.66358100  | 1.04402100  |
| H | -5.82802900 | 1.95908700  | 0.84751600  |
| H | -4.26015800 | 1.75221800  | 0.08208800  |
| C | -4.75420600 | 0.20105900  | 1.50631300  |
| H | -3.71275300 | -0.09421000 | 1.70300600  |



|   |             |              |             |
|---|-------------|--------------|-------------|
| H | -5.28046800 | 0.11263700   | 2.46853500  |
| C | -5.37514400 | -0.77490200  | 0.49846100  |
| H | -6.41668500 | -0.47973400  | 0.30181100  |
| H | -4.84900900 | -0.68611900  | -0.46376700 |
| C | -5.34232700 | -2.23770800  | 0.95993600  |
| H | -4.30083300 | -2.53273300  | 1.15696900  |
| H | -5.86885600 | -2.32669500  | 1.92193300  |
| C | -5.96251100 | -3.21354000  | -0.04851500 |
| H | -7.00403800 | -2.91857200  | -0.24549600 |
| H | -5.43602000 | -3.12435900  | -1.01052500 |
| C | -5.92953200 | -4.67647100  | 0.41254200  |
| H | -4.88803500 | -4.97138400  | 0.60976000  |
| H | -6.45629000 | -4.76580000  | 1.37437800  |
| C | -6.54930700 | -5.65213400  | -0.59631500 |
| H | -7.59079700 | -5.35721900  | -0.79353300 |
| H | -6.02253700 | -5.56274100  | -1.55814400 |
| C | -6.51636700 | -7.11513400  | -0.13550400 |
| H | -5.47486100 | -7.41003300  | 0.06183600  |
| H | -7.04329100 | -7.20457800  | 0.82626100  |
| C | -7.13582300 | -8.09088100  | -1.14420600 |
| H | -8.17763700 | -7.79695900  | -1.34196800 |
| H | -6.60914300 | -8.00251800  | -2.10633600 |
| C | -7.10322600 | -9.55395700  | -0.68382800 |
| H | -6.06237800 | -9.84812900  | -0.48687700 |
| H | -7.63011600 | -9.64268500  | 0.27700700  |
| C | -7.72372600 | -10.52125600 | -1.69711800 |
| H | -7.68505600 | -11.55654300 | -1.33920600 |
| H | -8.77535900 | -10.27413300 | -1.88841900 |
| H | -7.19582200 | -10.48119300 | -2.65801200 |

\*\*\*\*\*

**The pyrolysis reaction: (Pathway A1) (the reactant, RA1)**

Basis set = 6-31G(d)

Nuclear repulsion energy= 1177.4703663Hartrees

E(RM062X) = -779.080448 Hartrees

Formula: C16H32O2

Cartesian:

|   |            |             |             |
|---|------------|-------------|-------------|
| C | 8.56451600 | -0.05850500 | 0.08135600  |
| O | 9.44288900 | 0.28600700  | 0.83043700  |
| O | 8.63657700 | -1.20301500 | -0.63357300 |
| H | 9.48627500 | -1.61599400 | -0.40068500 |
| C | 7.27980800 | 0.68419400  | -0.18388400 |
| H | 7.28488500 | 1.00303500  | -1.23348400 |
| H | 7.28828200 | 1.57838200  | 0.44368400  |
| C | 6.03558600 | -0.17069300 | 0.08171600  |
| H | 6.06502300 | -1.05803400 | -0.56017700 |
| H | 6.05549900 | -0.53016000 | 1.11849900  |
| C | 4.74444400 | 0.60662100  | -0.16310400 |
| H | 4.72686300 | 1.49861200  | 0.47810700  |
| H | 4.73100300 | 0.97200100  | -1.19948600 |

|   |              |             |             |
|---|--------------|-------------|-------------|
| C | 3.49240100   | -0.22854200 | 0.09583800  |
| H | 3.51230200   | -1.12120600 | -0.54457000 |
| H | 3.50723900   | -0.59385000 | 1.13206500  |
| C | 2.19709100   | 0.54218600  | -0.15016300 |
| H | 2.18287800   | 0.90830800  | -1.18625900 |
| H | 2.17789900   | 1.43485600  | 0.49051700  |
| C | 0.94450000   | -0.29246200 | 0.10808800  |
| H | 0.95924900   | -0.65904600 | 1.14402000  |
| H | 0.96398300   | -1.18506900 | -0.53273300 |
| C | -0.35159800  | 0.47720300  | -0.13704400 |
| H | -0.36622600  | 0.84415700  | -1.17288700 |
| H | -0.37112200  | 1.36965400  | 0.50402400  |
| C | -1.60408300  | -0.35770500 | 0.12092000  |
| H | -1.58902900  | -0.72502200 | 1.15662900  |
| H | -1.58461300  | -1.25001500 | -0.52037400 |
| C | -2.90056600  | 0.41160100  | -0.12332700 |
| H | -2.91584000  | 0.77877900  | -1.15909400 |
| H | -2.91986900  | 1.30400500  | 0.51784500  |
| C | -4.15291300  | -0.42333200 | 0.13522500  |
| H | -4.13729800  | -0.79071700 | 1.17091800  |
| H | -4.13377200  | -1.31564700 | -0.50609200 |
| C | -5.44957400  | 0.34591300  | -0.10826600 |
| H | -5.46563900  | 0.71272000  | -1.14415300 |
| H | -5.46828300  | 1.23858200  | 0.53255900  |
| C | -6.70189700  | -0.48866300 | 0.15160300  |
| H | -6.68554400  | -0.85546600 | 1.18752300  |
| H | -6.68325000  | -1.38138800 | -0.48920700 |
| C | -7.99867200  | 0.28026300  | -0.09134400 |
| H | -8.01640900  | 0.64636800  | -1.12761000 |
| H | -8.01750100  | 1.17376800  | 0.54856900  |
| C | -9.25150900  | -0.55344700 | 0.17026400  |
| H | -9.23214600  | -0.91766800 | 1.20554500  |
| H | -9.23100400  | -1.44528000 | -0.46932200 |
| C | -10.53945400 | 0.22790000  | -0.07678200 |
| H | -10.59119300 | 0.57652700  | -1.11371100 |
| H | -11.42566100 | -0.38339200 | 0.11636100  |
| H | -10.59117400 | 1.10909100  | 0.57149400  |

\*\*\*\*\*

**The pyrolysis reaction: (Pathway A1) (Ketene Transition State, TSA1)**

Basis set = 6-31G(d)

Nuclear repulsion energy= 1176.731970 Hartrees

E(RM062X) = -778.944691 Hartrees

Formula: C16H32O2

Cartesian:

|   |             |             |             |
|---|-------------|-------------|-------------|
| C | -8.54831800 | -0.04509400 | 0.03038400  |
| O | -9.70400700 | -0.20719200 | 0.12706700  |
| O | -8.03808200 | 1.63533300  | -0.03861600 |
| H | -8.76029800 | 2.10007100  | -0.49415200 |
| C | -7.30074400 | -0.52459500 | -0.41994100 |

|   |             |             |             |
|---|-------------|-------------|-------------|
| H | -7.44032300 | 0.89182300  | -0.80089600 |
| H | -7.38936000 | -1.49891400 | -0.89937200 |
| C | -6.05247900 | -0.34062800 | 0.44212900  |
| H | -6.11821700 | 0.60035800  | 0.99909400  |
| H | -5.99171100 | -1.14317700 | 1.19008300  |
| C | -4.77942400 | -0.34852700 | -0.40262600 |
| H | -4.75131000 | -1.26210700 | -1.01268700 |
| H | -4.81245000 | 0.49160000  | -1.10924900 |
| C | -3.51031800 | -0.26282400 | 0.44160800  |
| H | -3.48182000 | -1.10761600 | 1.14393100  |
| H | -3.54393100 | 0.64676200  | 1.05749600  |
| C | -2.23327800 | -0.25963200 | -0.39602400 |
| H | -2.20114200 | -1.16845900 | -1.01314400 |
| H | -2.26067500 | 0.58590500  | -1.09742600 |
| C | -0.96239900 | -0.17595300 | 0.44667400  |
| H | -0.93537700 | -1.02124200 | 1.14852300  |
| H | -0.99459300 | 0.73302200  | 1.06351900  |
| C | 0.31473300  | -0.17351400 | -0.39073100 |
| H | 0.34688000  | -1.08270400 | -1.00735400 |
| H | 0.28742500  | 0.67151000  | -1.09291200 |
| C | 1.58590800  | -0.08931300 | 0.45150100  |
| H | 1.61289700  | -0.93393800 | 1.15417400  |
| H | 1.55404100  | 0.82020900  | 1.06761900  |
| C | 2.86306800  | -0.08782400 | -0.38587600 |
| H | 2.89519000  | -0.99769700 | -1.00149700 |
| H | 2.83574200  | 0.75638900  | -1.08904800 |
| C | 4.13430300  | -0.00263600 | 0.45616500  |
| H | 4.16142800  | -0.84653900 | 1.15971100  |
| H | 4.10233900  | 0.90750400  | 1.07138800  |
| C | 5.41148500  | -0.00178200 | -0.38117400 |
| H | 5.44392100  | -0.91239000 | -0.99568200 |
| H | 5.38390100  | 0.84155000  | -1.08538900 |
| C | 6.68271300  | 0.08489800  | 0.46074600  |
| H | 6.71008100  | -0.75816100 | 1.16533600  |
| H | 6.65027700  | 0.99578200  | 1.07489800  |
| C | 7.96000000  | 0.08531200  | -0.37614800 |
| H | 7.99387200  | -0.82612000 | -0.98961900 |
| H | 7.93281000  | 0.92760500  | -1.08185100 |
| C | 9.23166400  | 0.17398900  | 0.46536200  |
| H | 9.25707300  | -0.66756400 | 1.16962900  |
| H | 9.19619300  | 1.08494400  | 1.07670900  |
| C | 10.49980700 | 0.17299200  | -0.38440200 |
| H | 11.39988700 | 0.23825800  | 0.23360400  |
| H | 10.56807600 | -0.74232600 | -0.98187300 |
| H | 10.50555500 | 1.02132600  | -1.07704700 |

\*\*\*\*\*

**The pyrolysis reaction: (Pathway A1) (Ketene product)**

Basis set = 6-31G(d)

Nuclear repulsion energy= 1186.094607 Hartrees

E(RM062X) = -779.010725349 Hartrees

Formula: C16H32O2

Cartesian:

|   |             |             |             |
|---|-------------|-------------|-------------|
| C | -7.74164700 | 0.48835000  | -0.43173200 |
| O | -7.80603400 | 1.60295400  | -0.79165600 |
| O | -5.72416900 | 2.70136800  | 0.96183200  |
| H | -6.62724600 | 2.69512800  | 0.61261900  |
| C | -7.66329600 | -0.75783600 | -0.03160300 |
| H | -5.18121700 | 2.87920700  | 0.18229700  |
| H | -8.60566600 | -1.26339600 | 0.14823500  |
| C | -6.33722100 | -1.45038600 | 0.20392400  |
| H | -6.29964600 | -2.36740800 | -0.39768300 |
| H | -6.28327300 | -1.76207400 | 1.25476100  |
| C | -5.13574200 | -0.56540700 | -0.12373100 |
| H | -5.17318400 | -0.28935700 | -1.18759800 |
| H | -5.20738800 | 0.36797900  | 0.45080500  |
| C | -3.80266800 | -1.24623100 | 0.17433300  |
| H | -3.76797000 | -1.52557000 | 1.23627900  |
| H | -3.72879100 | -2.18316200 | -0.39542100 |
| C | -2.60385300 | -0.35759800 | -0.15101000 |
| H | -2.68963300 | 0.58270100  | 0.41141900  |
| H | -2.63203700 | -0.08465600 | -1.21540000 |
| C | -1.26341200 | -1.01692000 | 0.16575900  |
| H | -1.23416000 | -1.28568100 | 1.23087100  |
| H | -1.18119000 | -1.96092400 | -0.39108400 |
| C | -0.06506900 | -0.12954600 | -0.16409400 |
| H | -0.15035500 | 0.81614800  | 0.38919900  |
| H | -0.09165000 | 0.13586000  | -1.23032500 |
| C | 1.27561600  | -0.78507800 | 0.16012700  |
| H | 1.30236400  | -1.04876400 | 1.22668600  |
| H | 1.36050200  | -1.73196000 | -0.39139000 |
| C | 2.47411800  | 0.10165800  | -0.17091600 |
| H | 2.38739200  | 1.04961200  | 0.37837400  |
| H | 2.44915600  | 0.36313300  | -1.23812600 |
| C | 3.81471700  | -0.55169400 | 0.15805900  |
| H | 3.83949900  | -0.81256200 | 1.22539400  |
| H | 3.90155100  | -1.50002900 | -0.39064600 |
| C | 5.01324100  | 0.33505200  | -0.17288800 |
| H | 4.92531100  | 1.28396500  | 0.37458000  |
| H | 4.98953900  | 0.59468600  | -1.24056400 |
| C | 6.35381500  | -0.31696400 | 0.15888100  |
| H | 6.37712600  | -0.57671100 | 1.22656000  |
| H | 6.44198300  | -1.26587700 | -0.38865500 |
| C | 7.55237700  | 0.56981600  | -0.17113600 |
| H | 7.46450500  | 1.51915200  | 0.37591400  |
| H | 7.53024600  | 0.82955300  | -1.23897000 |
| C | 8.89342700  | -0.08131000 | 0.16158600  |
| H | 8.91338700  | -0.34041000 | 1.22804200  |
| H | 8.97982900  | -1.02865900 | -0.38610400 |
| C | 10.08169300 | 0.81692700  | -0.17231400 |

|   |             |            |             |
|---|-------------|------------|-------------|
| H | 10.02822900 | 1.75758900 | 0.38603300  |
| H | 11.03288600 | 0.33530100 | 0.07183800  |
| H | 10.09494600 | 1.06560200 | -1.23882500 |

\*\*\*\*\*

**The pyrolysis reaction: (Pathway A) (Ketene + Palmitic acid)**

Basis set = 6-31G(d)

Nuclear repulsion energy= 3170.790519 Hartrees

E(RM062X) = -1481.634011 Hartrees

Formula: C32H62O3

Cartesian:

|   |             |             |             |
|---|-------------|-------------|-------------|
| C | -7.69814600 | -2.39315300 | 1.22741800  |
| O | -8.73867800 | -2.69896700 | 0.77758600  |
| C | -6.55999800 | -2.06318300 | 1.78779600  |
| H | -6.48317400 | -2.32076200 | 2.84062900  |
| C | -5.40039000 | -1.38948000 | 1.08945500  |
| H | -5.69412100 | -1.11215100 | 0.07314100  |
| H | -5.17723900 | -0.45267800 | 1.61956100  |
| C | -8.56346600 | 0.26802600  | -0.69041800 |
| O | -7.69344800 | -0.53581500 | -0.94383200 |
| O | -9.67902200 | -0.05401800 | -0.02532200 |
| H | -9.62522600 | -1.00696400 | 0.19290400  |
| C | -8.52737700 | 1.72479300  | -1.09292300 |
| H | -8.80058800 | 2.32664900  | -0.21838700 |
| H | -9.32653100 | 1.87510900  | -1.82865800 |
| C | -7.16062100 | 2.10997000  | -1.64894500 |
| H | -7.22589400 | 3.08378100  | -2.14677300 |
| H | -6.88143200 | 1.37532200  | -2.41224900 |
| C | -4.13862100 | -2.25531200 | 1.05738800  |
| H | -3.91554100 | -2.62170000 | 2.06868600  |
| H | -4.32560600 | -3.14286300 | 0.44004700  |
| C | -2.93286800 | -1.48533300 | 0.52301600  |
| H | -2.73307000 | -0.62808900 | 1.18301000  |
| H | -3.17540100 | -1.06028700 | -0.46239500 |
| C | -1.66802400 | -2.33418300 | 0.41697800  |
| H | -1.47391600 | -2.81765700 | 1.38470500  |
| H | -1.82836400 | -3.14580100 | -0.30584300 |
| C | -0.44424800 | -1.51669000 | 0.01164800  |
| H | -0.64111700 | -1.01421800 | -0.94672200 |
| H | -0.28876100 | -0.71463000 | 0.74876000  |
| C | 0.83665800  | -2.34021400 | -0.10070400 |
| H | 0.98255200  | -2.91309700 | 0.82578200  |
| H | 0.73149900  | -3.07972000 | -0.90649000 |
| C | 2.06774700  | -1.47329700 | -0.35171000 |
| H | 2.17337100  | -0.75578400 | 0.47610200  |
| H | 1.91226400  | -0.86970000 | -1.25806100 |
| C | 3.36505400  | -2.26616500 | -0.49096800 |
| H | 3.47828800  | -2.93606000 | 0.37283100  |
| H | 3.30772800  | -2.91333300 | -1.37711700 |
| C | 4.59206200  | -1.36332500 | -0.59042800 |

|   |             |             |             |
|---|-------------|-------------|-------------|
| H | 4.66285200  | -0.75435700 | 0.32349500  |
| H | 4.45592900  | -0.65227200 | -1.41879100 |
| C | 5.90267500  | -2.12061300 | -0.78943200 |
| H | 6.01066400  | -2.87921700 | -0.00165800 |
| H | 5.86813200  | -2.66829300 | -1.74143700 |
| C | 7.11928400  | -1.19834100 | -0.77212700 |
| H | 7.16801600  | -0.68852000 | 0.20158500  |
| H | 6.98587700  | -0.40608000 | -1.52394800 |
| C | 8.44092100  | -1.91766000 | -1.02874700 |
| H | 8.57167700  | -2.71703400 | -0.28575400 |
| H | 8.40268200  | -2.41361200 | -2.00885700 |
| C | 9.64751200  | -0.98204500 | -0.98146900 |
| H | 9.68583600  | -0.49389800 | 0.00150000  |
| H | 9.50930800  | -0.17835700 | -1.71709800 |
| C | 10.96496700 | -1.70506800 | -1.24948100 |
| H | 11.81640400 | -1.01968100 | -1.20982700 |
| H | 11.13385900 | -2.49407400 | -0.50897400 |
| H | 10.95765500 | -2.17527800 | -2.23857300 |
| C | -6.07690400 | 2.15130000  | -0.56888400 |
| H | -6.20445700 | 3.05275800  | 0.04629600  |
| H | -6.20043900 | 1.29276200  | 0.10339100  |
| C | -4.66712500 | 2.11272700  | -1.15193000 |
| H | -4.54751100 | 2.91862700  | -1.89013700 |
| H | -4.54396300 | 1.16946300  | -1.70360200 |
| C | -3.57023400 | 2.22439800  | -0.09598000 |
| H | -3.65841600 | 3.18789000  | 0.42523300  |
| H | -3.72333800 | 1.44736000  | 0.66692100  |
| C | -2.16753700 | 2.08865900  | -0.68327300 |
| H | -2.08142700 | 1.11778400  | -1.19292100 |
| H | -2.02456400 | 2.85408500  | -1.45940800 |
| C | -1.05227100 | 2.20697400  | 0.35261500  |
| H | -1.15208500 | 3.15797200  | 0.89450400  |
| H | -1.16989100 | 1.41354100  | 1.10511500  |
| C | 0.34035100  | 2.12262800  | -0.26869000 |
| H | 0.41659200  | 1.20460600  | -0.86919600 |
| H | 0.47211100  | 2.95831400  | -0.97054300 |
| C | 1.47193000  | 2.13841200  | 0.75585400  |
| H | 1.36341300  | 3.01203400  | 1.41398600  |
| H | 1.38291200  | 1.25530000  | 1.40600000  |
| C | 2.85580600  | 2.16145700  | 0.10939000  |
| H | 2.93063400  | 1.34423300  | -0.62263400 |
| H | 2.97152200  | 3.09392800  | -0.46084000 |
| C | 3.99798300  | 2.03366000  | 1.11394300  |
| H | 3.88904100  | 2.79783300  | 1.89651100  |
| H | 3.91966000  | 1.06268200  | 1.62552000  |
| C | 5.37788400  | 2.16232400  | 0.47156000  |
| H | 5.45666900  | 1.45954600  | -0.37075700 |
| H | 5.48456600  | 3.16831300  | 0.04201000  |
| C | 6.52222500  | 1.89960800  | 1.44687800  |
| H | 6.41539500  | 2.55109000  | 2.32597800  |

|   |             |            |             |
|---|-------------|------------|-------------|
| H | 6.44330100  | 0.86853100 | 1.82330100  |
| C | 7.90305200  | 2.10926700 | 0.82836100  |
| H | 7.98529700  | 1.50873100 | -0.08752300 |
| H | 8.00324800  | 3.15714900 | 0.51763200  |
| C | 9.03412500  | 1.74168400 | 1.78467800  |
| H | 10.01621600 | 1.88993300 | 1.32561200  |
| H | 8.99176900  | 2.34975200 | 2.69477000  |
| H | 8.95989400  | 0.69054700 | 2.08698300  |

\*\*\*\*\*

**The pyrolysis reaction in the presence of radicals generated from unsaturated acid (oleic acid): (Pathway B) (Reactant, R1B)**

The first step is the formation of allylic radical.

Basis set = 6-31G(d)

Nuclear repulsion energy= 1356.1425074 Hartrees

E(RB3LYP) = -856.724481 Hartrees

Formula: C18H34O2

Cartesian:

|   |              |             |             |
|---|--------------|-------------|-------------|
| C | 8.43690400   | -0.54199700 | -0.11445500 |
| C | 7.13773600   | 0.24956500  | 0.04592400  |
| C | 5.89225400   | -0.64417900 | 0.00753300  |
| C | 4.58230300   | 0.13831300  | 0.16695800  |
| C | 3.33164900   | -0.74932500 | 0.13004200  |
| C | 2.02229000   | 0.03374200  | 0.28840900  |
| C | 0.76905700   | -0.86200200 | 0.24965200  |
| C | -0.51044800  | -0.09632900 | 0.45210900  |
| C | -1.50653600  | -0.00327700 | -0.43333700 |
| C | -2.78622900  | 0.76205000  | -0.23126600 |
| C | -4.03943100  | -0.13379600 | -0.27054600 |
| C | -5.34919200  | 0.64871300  | -0.11269400 |
| C | -6.60024900  | -0.23856500 | -0.14929300 |
| C | -7.91112900  | 0.54271800  | 0.00925500  |
| C | -9.16238300  | -0.34403700 | -0.02688500 |
| C | -10.47353600 | 0.43653800  | 0.13178500  |
| C | -11.71780300 | -0.45668100 | 0.09459700  |
| C | 9.67474600   | 0.32748400  | -0.07729300 |
| O | 9.70179600   | 1.53011300  | 0.06343500  |
| O | 10.80552900  | -0.41178500 | -0.22448000 |
| H | 11.54589100  | 0.22278900  | -0.18860400 |
| H | 8.54029600   | -1.30244000 | 0.67167100  |
| H | 8.44990600   | -1.09997100 | -1.06071300 |
| H | 7.17053000   | 0.80587300  | 0.99099600  |
| H | 7.07914200   | 1.00770500  | -0.74496800 |
| H | 5.96073700   | -1.40294700 | 0.80150800  |
| H | 5.86925600   | -1.20069200 | -0.94144200 |
| H | 4.60580000   | 0.69467100  | 1.11552300  |
| H | 4.51406100   | 0.89627400  | -0.62709700 |
| H | 3.39988500   | -1.50727700 | 0.92475800  |
| H | 3.30933300   | -1.30626000 | -0.81857500 |
| H | 2.04184400   | 0.58841500  | 1.23802700  |
| H | 1.94508800   | 0.79053100  | -0.50445400 |

|   |              |             |             |
|---|--------------|-------------|-------------|
| H | 0.86599900   | -1.62982300 | 1.03351300  |
| H | 0.73120100   | -1.39965100 | -0.70748700 |
| H | -0.60309400  | 0.43285500  | 1.40392700  |
| H | -1.41366400  | -0.53260300 | -1.38510500 |
| H | -2.74881500  | 1.29980700  | 0.72580300  |
| H | -2.88284400  | 1.52978300  | -1.01520300 |
| H | -3.96222600  | -0.89067500 | 0.52233000  |
| H | -4.05831000  | -0.68852200 | -1.22023400 |
| H | -5.32716200  | 1.20614600  | 0.83563000  |
| H | -5.41748500  | 1.40644900  | -0.90760400 |
| H | -6.53090800  | -0.99632700 | 0.64525600  |
| H | -6.62227300  | -0.79581800 | -1.09770500 |
| H | -7.88880600  | 1.10018300  | 0.95758800  |
| H | -7.98040100  | 1.30052000  | -0.78545300 |
| H | -9.09406900  | -1.10204500 | 0.76784700  |
| H | -9.18577500  | -0.90172800 | -0.97519800 |
| H | -10.45070600 | 0.99319900  | 1.07956200  |
| H | -10.54236700 | 1.19344900  | -0.66259100 |
| H | -11.69500200 | -1.20184700 | 0.89944600  |
| H | -12.63640400 | 0.12998600  | 0.21027200  |
| H | -11.78729300 | -1.00024100 | -0.85582500 |

\*\*\*\*\*

**The pyrolysis reaction in the presence of radicals generated from unsaturated acid (oleic acid): (Pathway B) (the 1<sup>st</sup> Transition State, TS1B)**

The first step is the formation of allylic radical.

Basis set = 6-31G(d)

Nuclear repulsion energy= 1326.738177 Hartrees

E(RB3LYP) = -856.632121 Hartrees

Formula: C18H34O2

Cartesian:

|   |             |             |             |
|---|-------------|-------------|-------------|
| C | -8.27477000 | -0.74798700 | -0.35274100 |
| C | -7.06505000 | -0.02007900 | 0.23623700  |
| C | -5.78407800 | -0.25002400 | -0.57470800 |
| C | -4.56352400 | 0.47487900  | 0.00686900  |
| C | -3.27891500 | 0.24903300  | -0.79915300 |
| C | -2.05789900 | 0.97685200  | -0.21604700 |
| C | -0.80116200 | 0.77850300  | -1.01037100 |
| C | 0.51843100  | 1.17016400  | -0.48328400 |
| C | 1.39599200  | 0.34425100  | 0.10515300  |
| C | 2.73500500  | 0.74964100  | 0.65677700  |
| C | 3.91352200  | 0.02028400  | -0.01670400 |
| C | 5.27634900  | 0.39467200  | 0.57906600  |
| C | 6.45420000  | -0.32653800 | -0.08899000 |
| C | 7.81834300  | 0.04634000  | 0.50599300  |
| C | 8.99662400  | -0.67427300 | -0.16157600 |
| C | 10.36100100 | -0.30230500 | 0.43316300  |
| C | 11.53185900 | -1.02647400 | -0.23920700 |
| C | -9.54620700 | -0.52939700 | 0.43806400  |
| O | -9.66005900 | 0.14018600  | 1.44084400  |



|   |              |             |             |
|---|--------------|-------------|-------------|
| O | -10.59581900 | -1.19090000 | -0.11630900 |
| H | -11.36463700 | -0.99592900 | 0.45203700  |
| H | -8.46679700  | -0.43066900 | -1.38682800 |
| H | -8.09978800  | -1.83105200 | -0.40972300 |
| H | -7.28465900  | 1.05334300  | 0.29320700  |
| H | -6.91683000  | -0.34999000 | 1.27204100  |
| H | -5.94228200  | 0.08072400  | -1.61217000 |
| H | -5.57326900  | -1.32852300 | -0.62977500 |
| H | -4.77438700  | 1.55310800  | 0.06184500  |
| H | -4.40588000  | 0.14377800  | 1.04386200  |
| H | -3.43478800  | 0.58238900  | -1.83572500 |
| H | -3.06303400  | -0.82724000 | -0.85412100 |
| H | -2.29144200  | 2.05727500  | -0.13905000 |
| H | -1.88843800  | 0.65287800  | 0.82238500  |
| H | -0.89962800  | 0.58811300  | -2.07987800 |
| H | 1.98460700   | 0.93619900  | -2.88843000 |
| H | 0.78972200   | 2.23191600  | -0.55616500 |
| H | 1.14186600   | -0.71420300 | 0.18978200  |
| H | 2.86456800   | 1.83537000  | 0.55321000  |
| H | 2.76383500   | 0.53360200  | 1.73660200  |
| H | 3.90371400   | 0.24565800  | -1.09215500 |
| H | 3.76380700   | -1.06602400 | 0.06875700  |
| H | 5.42253200   | 1.48199800  | 0.49666300  |
| H | 5.27604800   | 0.16988900  | 1.65621300  |
| H | 6.45379400   | -0.10130000 | -1.16577400 |
| H | 6.30746700   | -1.41384000 | -0.00716700 |
| H | 7.96479200   | 1.13375300  | 0.42439500  |
| H | 7.81840100   | -0.17892300 | 1.58297600  |
| H | 8.99775200   | -0.44895200 | -1.23862700 |
| H | 8.85096000   | -1.76195500 | -0.08050400 |
| H | 10.50712400  | 0.78427400  | 0.35154100  |
| H | 10.36028800  | -0.52798400 | 1.50915500  |
| H | 11.58024500  | -0.79272500 | -1.30999700 |
| H | 12.49075000  | -0.73964400 | 0.20759800  |
| H | 11.43228000  | -2.11484200 | -0.14370100 |

\*\*\*\*\*

**The pyrolysis reaction in the presence of radicals generated from unsaturated acid (oleic acid): (Pathway B) (the Product, P1B)**

The first step is the formation of allylic radical.

Basis set = 6-31G(d)

Nuclear repulsion energy= 1325.547562 Hartrees

E(B3LYP) = -856.705886 Hartrees

Formula: C18H34O2

Cartesian:

|   |            |             |             |
|---|------------|-------------|-------------|
| C | 8.30171000 | 0.33411500  | 0.40555200  |
| C | 7.05675400 | -0.42498000 | -0.05709500 |
| C | 5.79140900 | 0.44087900  | -0.02718800 |
| C | 4.53580700 | -0.30990400 | -0.48895800 |
| C | 3.26627100 | 0.55030100  | -0.45947700 |
| C | 2.00667000 | -0.21154200 | -0.92511300 |

|   |              |             |             |
|---|--------------|-------------|-------------|
| C | 0.77147500   | 0.63593300  | -0.94252200 |
| C | -0.36923800  | 0.38837300  | -0.18711300 |
| C | -1.51866400  | 1.17055000  | -0.17367600 |
| C | -2.73936200  | 0.87921700  | 0.64416900  |
| C | -4.00034500  | 0.61923400  | -0.20870600 |
| C | -5.25650200  | 0.36430800  | 0.63372100  |
| C | -6.51366600  | 0.10573800  | -0.20681300 |
| C | -7.77107800  | -0.15044300 | 0.63424600  |
| C | -9.02869100  | -0.40914600 | -0.20525400 |
| C | -10.28635500 | -0.66536700 | 0.63514400  |
| C | -11.53739200 | -0.92289400 | -0.21102600 |
| C | 9.55800900   | -0.50903200 | 0.38216700  |
| O | 9.63569800   | -1.66963900 | 0.04481600  |
| O | 10.64004900  | 0.20048300  | 0.79726800  |
| H | 11.39638200  | -0.41428100 | 0.75098200  |
| H | 8.48334000   | 1.22029600  | -0.21779600 |
| H | 8.17761100   | 0.71883700  | 1.42707000  |
| H | 7.22538800   | -0.80697200 | -1.07167100 |
| H | 6.91982100   | -1.31016200 | 0.57644500  |
| H | 5.93832000   | 1.32737700  | -0.66219400 |
| H | 5.63177200   | 0.82210500  | 0.99248300  |
| H | 4.69446500   | -0.68994900 | -1.50894900 |
| H | 4.38988400   | -1.19645800 | 0.14555700  |
| H | 3.40852800   | 1.43506400  | -1.09687000 |
| H | 3.09907700   | 0.93043500  | 0.55770300  |
| H | 2.20123100   | -0.60782700 | -1.93564600 |
| H | 1.84942000   | -1.08552100 | -0.27844200 |
| H | 0.78115300   | 1.51015500  | -1.59510800 |
| H | -1.31133900  | -1.48333900 | -1.80108200 |
| H | -0.35173900  | -0.48336700 | 0.47112000  |
| H | -1.55500200  | 2.04867000  | -0.82007400 |
| H | -2.55440900  | 0.01257900  | 1.29347400  |
| H | -2.95024800  | 1.72837400  | 1.31544000  |
| H | -3.81349800  | -0.23970500 | -0.86759700 |
| H | -4.17171000  | 1.48077800  | -0.87025000 |
| H | -5.08052400  | -0.49534400 | 1.29744400  |
| H | -5.43178800  | 1.22640900  | 1.29464900  |
| H | -6.33722500  | -0.75568600 | -0.86785700 |
| H | -6.68969500  | 0.96545500  | -0.87038200 |
| H | -7.59470500  | -1.01012200 | 1.29788600  |
| H | -7.94715600  | 0.71112300  | 1.29556000  |
| H | -8.85360000  | -1.27096300 | -0.86661800 |
| H | -9.20603500  | 0.45024600  | -0.86920900 |
| H | -10.10960900 | -1.52438500 | 1.29810700  |
| H | -10.46190900 | 0.19594900  | 1.29545600  |
| H | -11.40557000 | -1.79998100 | -0.85670300 |
| H | -12.41713600 | -1.10187600 | 0.41778000  |
| H | -11.76035000 | -0.06670600 | -0.85972700 |

\*\*\*\*\*

**The pyrolysis reaction in the presence of radicals generated from unsaturated acid (oleic acid): (Pathway B) (the Reactant, R2B)**

The second step is the decarboxylation.

Basis set = 6-31G(d)

Nuclear repulsion energy= 3587.855740 Hartrees

E(UB3LYP) = -1636.158499 Hartrees

Formula: C34H66O4

Cartesian:

0 3

|   |             |              |             |
|---|-------------|--------------|-------------|
| C | -8.73636700 | 5.50411000   | -0.58495200 |
| C | -8.10584400 | 4.36496700   | -1.38808100 |
| C | -7.72927500 | 3.16336600   | -0.51306000 |
| C | -7.09583500 | 2.01458500   | -1.30852100 |
| C | -6.70863400 | 0.81569500   | -0.43449500 |
| C | -6.08118600 | -0.34235000  | -1.23994500 |
| C | -5.69187300 | -1.51072900  | -0.38678000 |
| C | -4.42358700 | -2.08265300  | -0.35051800 |
| C | -4.03917700 | -3.15595400  | 0.44819100  |
| C | -2.67946700 | -3.78549400  | 0.43758800  |
| C | -2.69249100 | -5.25160000  | -0.05051300 |
| C | -1.30767400 | -5.91021300  | -0.01263100 |
| C | -1.31315000 | -7.36703100  | -0.49364000 |
| C | 0.07018400  | -8.02965000  | -0.45426000 |
| C | 0.06535800  | -9.48680700  | -0.93364400 |
| C | 1.44777300  | -10.15093400 | -0.89349000 |
| C | 1.43369400  | -11.60582800 | -1.37344800 |
| C | -9.10964900 | 6.69773600   | -1.43666100 |
| O | -8.94345500 | 6.80486600   | -2.63174600 |
| O | -9.67543000 | 7.68252500   | -0.69118600 |
| H | -9.88034100 | 8.40517800   | -1.31397600 |
| H | -9.64287900 | 5.17012600   | -0.06211900 |
| H | -8.05962200 | 5.85677600   | 0.20526800  |
| H | -8.80293600 | 4.05192900   | -2.17548300 |
| H | -7.21699000 | 4.74255300   | -1.90877300 |
| H | -8.62464200 | 2.79297300   | 0.00785000  |
| H | -7.03285400 | 3.48558700   | 0.27484900  |
| H | -7.79423400 | 1.68573900   | -2.09233700 |
| H | -6.20367700 | 2.38658500   | -1.83373800 |
| H | -7.59880100 | 0.44311300   | 0.09223500  |
| H | -6.00778400 | 1.13305900   | 0.34858800  |
| H | -6.81075100 | -0.66624900  | -2.00117600 |
| H | -5.20496100 | 0.02274600   | -1.79382800 |
| H | -6.46895000 | -1.93662100  | 0.24984900  |
| H | -2.43554100 | 0.91751300   | -1.85502500 |
| H | -3.66357400 | -1.65302000  | -1.00842000 |
| H | -4.78663700 | -3.60688200  | 1.10264400  |
| H | -1.99955000 | -3.19792400  | -0.19438200 |
| H | -2.25238800 | -3.77041200  | 1.45374400  |
| H | -3.09209600 | -5.28389700  | -1.07321900 |
| H | -3.39110200 | -5.83066600  | 0.57009400  |

|   |             |              |             |
|---|-------------|--------------|-------------|
| H | -0.60983800 | -5.32591400  | -0.63066900 |
| H | -0.91345900 | -5.86730100  | 1.01359800  |
| H | -1.70707400 | -7.40900100  | -1.51988800 |
| H | -2.01268000 | -7.95004200  | 0.12357400  |
| H | 0.76969200  | -7.44662700  | -1.07174000 |
| H | 0.46403100  | -7.98657300  | 0.57214100  |
| H | -0.32766300 | -9.53068200  | -1.96046900 |
| H | -0.63448400 | -10.07026500 | -0.31676900 |
| H | 2.14698800  | -9.56858000  | -1.51042400 |
| H | 1.84025300  | -10.10759200 | 0.13252200  |
| H | 1.07891100  | -11.67824300 | -2.40901100 |
| H | 2.43437800  | -12.05101900 | -1.33269500 |
| H | 0.76991400  | -12.22134000 | -0.75373600 |
| C | -3.36917500 | 0.53533000   | 2.74163400  |
| O | -3.34803500 | 1.29675900   | 3.67761700  |
| O | -4.51836500 | -0.11396500  | 2.41740500  |
| H | -4.38969900 | -0.69465700  | 1.64270900  |
| C | -2.16969300 | 0.22871100   | 1.85174100  |
| H | -2.44165100 | 0.47425500   | 0.81389800  |
| H | -2.00137200 | -0.85823300  | 1.86256500  |
| C | -0.90255800 | 0.97810300   | 2.26723000  |
| H | -1.11016400 | 2.05504400   | 2.26580100  |
| H | -0.66253000 | 0.72273000   | 3.30659000  |
| C | 0.29520000  | 0.67204900   | 1.36003500  |
| H | 0.49529100  | -0.41016400  | 1.36750500  |
| H | 0.04169900  | 0.92548300   | 0.31935700  |
| C | 1.56878000  | 1.42431900   | 1.76717700  |
| H | 1.36801700  | 2.50570800   | 1.75953200  |
| H | 1.82184400  | 1.17098300   | 2.80715400  |
| C | 2.77243900  | 1.12514200   | 0.86433900  |
| H | 2.51755400  | 1.37676700   | -0.17607600 |
| H | 2.97368500  | 0.04340900   | 0.87355400  |
| C | 4.04489700  | 1.88016400   | 1.27005500  |
| H | 4.29972800  | 1.62883600   | 2.31036000  |
| H | 3.84315500  | 2.96162200   | 1.26100400  |
| C | 5.24928300  | 1.58234700   | 0.36753500  |
| H | 4.99366000  | 1.83238900   | -0.67303400 |
| H | 5.45200500  | 0.50093700   | 0.37770300  |
| C | 6.52086600  | 2.33952100   | 0.77199600  |
| H | 6.77650600  | 2.08966700   | 1.81252700  |
| H | 6.31779500  | 3.42078600   | 0.76188000  |
| C | 7.72549100  | 2.04246000   | -0.13047200 |
| H | 7.46934300  | 2.29135800   | -1.17117200 |
| H | 7.92935200  | 0.96128500   | -0.11954400 |
| C | 8.99641500  | 2.80123500   | 0.27305200  |
| H | 9.25259500  | 2.55246800   | 1.31373700  |
| H | 8.79233200  | 3.88232600   | 0.26212400  |
| C | 10.20113600 | 2.50461600   | -0.62942700 |
| H | 9.94464000  | 2.75274700   | -1.67021300 |
| H | 10.40575600 | 1.42360100   | -0.61795800 |

|   |             |            |             |
|---|-------------|------------|-------------|
| C | 11.47164500 | 3.26442500 | -0.22656900 |
| H | 11.72814500 | 3.01637200 | 0.81424700  |
| H | 11.26688400 | 4.34542000 | -0.23807000 |
| C | 12.67650300 | 2.96829900 | -1.12873300 |
| H | 12.42093100 | 3.21616300 | -2.16995300 |
| H | 12.88261500 | 1.88742900 | -1.11728400 |
| C | 13.94697900 | 3.72840200 | -0.72655500 |
| H | 14.20301300 | 3.48035100 | 0.31344300  |
| H | 13.74149400 | 4.80835400 | -0.73867000 |
| C | 15.14505100 | 3.42685400 | -1.63270800 |
| H | 14.93219800 | 3.69731900 | -2.67440800 |
| H | 16.03530000 | 3.98431400 | -1.31952100 |
| H | 15.39714600 | 2.35927900 | -1.61440400 |

\*\*\*\*\*

**The pyrolysis reaction in the presence of radicals generated from unsaturated acid (oleic acid): (Pathway B) ( Transition State, TS2B)**

The second step is the decarboxylation.

Basis set = 6-31G(d)

Nuclear repulsion energy= 3612.085630 Hartrees

E(UB3LYP) = -1635.944552 Hartrees

Formula: C34H66O4

Cartesian:

0 3

|   |             |              |             |
|---|-------------|--------------|-------------|
| C | -2.33513000 | 8.44637000   | -0.38828100 |
| C | -3.12108200 | 7.38010300   | -1.15348000 |
| C | -3.50183700 | 6.18228200   | -0.27497300 |
| C | -4.29077600 | 5.10694700   | -1.03310900 |
| C | -4.67126000 | 3.90508300   | -0.15997700 |
| C | -5.46187200 | 2.82442300   | -0.93049600 |
| C | -5.87266400 | 1.66760100   | -0.07197400 |
| C | -5.44521400 | 0.35565500   | -0.25534800 |
| C | -5.79299800 | -0.73108500  | 0.54197100  |
| C | -5.34702800 | -2.14140500  | 0.30345700  |
| C | -6.51437900 | -3.10678900  | 0.00012700  |
| C | -6.05793000 | -4.55743300  | -0.20009900 |
| C | -7.21158200 | -5.52389300  | -0.49812100 |
| C | -6.75686400 | -6.97512700  | -0.70121900 |
| C | -7.90959400 | -7.94309400  | -0.99697900 |
| C | -7.45562500 | -9.39423500  | -1.20128600 |
| C | -8.61296600 | -10.35420000 | -1.49515900 |
| C | -1.95077500 | 9.63268800   | -1.24536800 |
| O | -2.20402100 | 9.77890100   | -2.42080400 |
| O | -1.26092800 | 10.55930100  | -0.53037300 |
| H | -1.05563900 | 11.28044800  | -1.15479800 |
| H | -2.90731500 | 8.82543000   | 0.46939700  |
| H | -1.41243600 | 8.03133300   | 0.03976300  |
| H | -4.02443100 | 7.83560700   | -1.57808600 |
| H | -2.52591600 | 7.04178100   | -2.01083700 |
| H | -4.09524600 | 6.52997000   | 0.58362400  |

|   |             |              |             |
|---|-------------|--------------|-------------|
| H | -2.59144100 | 5.73313400   | 0.14872300  |
| H | -5.20300900 | 5.55456900   | -1.45444900 |
| H | -3.69790600 | 4.76038100   | -1.89239200 |
| H | -5.26787300 | 4.24684900   | 0.69754200  |
| H | -3.76460200 | 3.44989200   | 0.26162000  |
| H | -6.35683200 | 3.29794200   | -1.36585800 |
| H | -4.85977200 | 2.46568000   | -1.77625000 |
| H | -6.54025000 | 1.88348100   | 0.76345200  |
| H | -2.45624600 | 0.83338100   | 0.80735100  |
| H | -4.78193200 | 0.16176700   | -1.10161000 |
| H | -6.46276800 | -0.56085700  | 1.38611600  |
| H | -4.62627100 | -2.17027500  | -0.52528200 |
| H | -4.81515300 | -2.51961200  | 1.19181700  |
| H | -7.04410200 | -2.75672300  | -0.89629900 |
| H | -7.24164600 | -3.06130800  | 0.82331900  |
| H | -5.32792300 | -4.59856700  | -1.02218800 |
| H | -5.52205100 | -4.89666800  | 0.69888200  |
| H | -7.74857300 | -5.18255400  | -1.39550400 |
| H | -7.94044300 | -5.48343200  | 0.32488200  |
| H | -6.02873700 | -7.01527100  | -1.52509500 |
| H | -6.21821000 | -7.31552900  | 0.19569900  |
| H | -8.44931100 | -7.60303700  | -1.89355700 |
| H | -8.63765900 | -7.90426600  | -0.17286600 |
| H | -6.72910600 | -9.43338700  | -2.02548000 |
| H | -6.91646500 | -9.73411400  | -0.30551200 |
| H | -9.15024100 | -10.06057600 | -2.40546600 |
| H | -8.25626400 | -11.38094600 | -1.63590900 |
| H | -9.33875400 | -10.36364300 | -0.67257100 |
| C | -2.63221500 | 1.00342400   | 2.85921600  |
| O | -2.08114100 | 1.28349100   | 3.88256000  |
| O | -3.89519600 | 1.29712500   | 2.56386700  |
| H | -4.09510100 | 1.01769100   | 1.64201600  |
| C | -1.69354100 | 0.08769400   | 1.57602000  |
| H | -1.95693500 | -0.74975600  | 0.88630600  |
| H | -1.45441700 | -0.57949500  | 2.47700200  |
| C | -0.30824000 | 0.69148600   | 1.24276500  |
| H | -0.35553200 | 1.21318700   | 0.27781200  |
| H | -0.07925500 | 1.45113600   | 2.00011600  |
| C | 0.81663200  | -0.35133400  | 1.21324600  |
| H | 0.86087500  | -0.86494400  | 2.18437500  |
| H | 0.58034300  | -1.12454100  | 0.46682200  |
| C | 2.19014400  | 0.25471500   | 0.89662000  |
| H | 2.14402000  | 0.77630200   | -0.07101900 |
| H | 2.42652600  | 1.02463400   | 1.64567700  |
| C | 3.32130500  | -0.78114900  | 0.85904600  |
| H | 3.08498900  | -1.54959600  | 0.10785000  |
| H | 3.36543200  | -1.30536400  | 1.82519300  |
| C | 4.69615000  | -0.17527600  | 0.54846800  |
| H | 4.93413800  | 0.58935100   | 1.30280400  |
| H | 4.65033200  | 0.35410000   | -0.41500300 |

|   |             |             |             |
|---|-------------|-------------|-------------|
| C | 5.82697300  | -1.21114100 | 0.50311100  |
| H | 5.59007300  | -1.97392700 | -0.25363800 |
| H | 5.87091500  | -1.74298100 | 1.46523300  |
| C | 7.20249400  | -0.60449600 | 0.19696700  |
| H | 7.44107000  | 0.15507500  | 0.95631200  |
| H | 7.15729700  | -0.06864600 | -0.76294500 |
| C | 8.33267700  | -1.64075300 | 0.14495600  |
| H | 8.09489900  | -2.39890700 | -0.61614600 |
| H | 8.37668200  | -2.17839700 | 1.10388100  |
| C | 9.70855000  | -1.03343400 | -0.15825500 |
| H | 9.94768200  | -0.27770700 | 0.60477500  |
| H | 9.66358000  | -0.49283600 | -1.11551000 |
| C | 10.83815400 | -2.07004600 | -0.21540200 |
| H | 10.59949700 | -2.82485400 | -0.97953300 |
| H | 10.88245900 | -2.61177800 | 0.74121300  |
| C | 12.21421100 | -1.46231300 | -0.51691200 |
| H | 12.45374800 | -0.70903500 | 0.24846400  |
| H | 12.16925500 | -0.91869800 | -1.47248500 |
| C | 13.34356400 | -2.49874500 | -0.57745500 |
| H | 13.10531800 | -3.25192400 | -1.34351400 |
| H | 13.38932100 | -3.04323700 | 0.37769200  |
| C | 14.71982200 | -1.89122100 | -0.87817000 |
| H | 14.95875800 | -1.13979000 | -0.11205700 |
| H | 14.67439900 | -1.34715700 | -1.83243700 |
| C | 15.84141000 | -2.93329100 | -0.93796900 |
| H | 15.64840300 | -3.67897600 | -1.71918500 |
| H | 16.81012000 | -2.46818400 | -1.15402800 |
| H | 15.93481500 | -3.47023600 | 0.01416600  |

\*\*\*\*\*

**The pyrolysis reaction in the presence of radicals generated from unsaturated acid (oleic acid): (Pathway B) (the Product, P2B)**

The second step is the decarboxylation.

Basis set = 6-31G(d)

Nuclear repulsion energy= 3709.291978 Hartrees

E(UB3LYP) = -1636.215306 Hartrees

Formula: C34H66O4

Cartesian:

0 3

|   |             |             |             |
|---|-------------|-------------|-------------|
| C | 13.03974600 | -1.10688600 | -0.25962700 |
| C | 11.69439900 | -1.46054800 | 0.37682800  |
| C | 10.51518800 | -0.75322900 | -0.30168700 |
| C | 9.16102200  | -1.09820800 | 0.33142000  |
| C | 7.97688000  | -0.39517200 | -0.34404300 |
| C | 6.62494600  | -0.73974700 | 0.29215300  |
| C | 5.44574000  | -0.03157700 | -0.39228700 |
| C | 4.12454000  | -0.24735100 | 0.24208300  |
| C | 2.93002100  | -0.14155200 | -0.41033000 |
| C | 1.58641100  | -0.27416000 | 0.22019800  |
| C | 0.68905800  | -1.32954800 | -0.46048200 |

|   |             |             |             |
|---|-------------|-------------|-------------|
| C | -0.72100300 | -1.37949400 | 0.14130000  |
| C | -1.63025700 | -2.42019600 | -0.52459100 |
| C | -3.04464000 | -2.46145700 | 0.06881800  |
| C | -3.95740100 | -3.50056200 | -0.59467000 |
| C | -5.37291500 | -3.53978100 | -0.00438100 |
| C | -6.27698700 | -4.58197000 | -0.67052300 |
| C | 14.21110900 | -1.80463500 | 0.39684800  |
| O | 14.15351200 | -2.58107000 | 1.32465600  |
| O | 15.38723400 | -1.45676500 | -0.18745300 |
| H | 16.08022000 | -1.94778600 | 0.29295600  |
| H | 13.05539300 | -1.36356400 | -1.32774800 |
| H | 13.22904600 | -0.02564900 | -0.21846600 |
| H | 11.55297200 | -2.54777700 | 0.33639600  |
| H | 11.72271400 | -1.20237300 | 1.44280300  |
| H | 10.49430300 | -1.01692000 | -1.36970600 |
| H | 10.66704100 | 0.33557600  | -0.26151600 |
| H | 9.00967200  | -2.18709200 | 0.29303400  |
| H | 9.18184000  | -0.83193500 | 1.39835200  |
| H | 7.95504700  | -0.66301100 | -1.41075500 |
| H | 8.12611100  | 0.69330300  | -0.30675400 |
| H | 6.46841800  | -1.82746300 | 0.25734700  |
| H | 6.64145300  | -0.46506200 | 1.35651800  |
| H | 5.40380100  | -0.27498500 | -1.46307400 |
| H | 2.10567200  | 5.75094600  | -0.16603300 |
| H | 4.10687200  | -0.41044000 | 1.32092000  |
| H | 2.94561000  | 0.02419000  | -1.48775500 |
| H | 1.68858900  | -0.49262100 | 1.29067300  |
| H | 1.09695300  | 0.70949200  | 0.14411300  |
| H | 1.16134800  | -2.31828100 | -0.37962800 |
| H | 0.62036900  | -1.10686800 | -1.53475600 |
| H | -0.64994700 | -1.59331300 | 1.21785800  |
| H | -1.18302900 | -0.38473900 | 0.05824200  |
| H | -1.16973900 | -3.41544200 | -0.43670400 |
| H | -1.69483500 | -2.20927600 | -1.60226400 |
| H | -2.98011300 | -2.67023100 | 1.14707200  |
| H | -3.50376700 | -1.46548700 | -0.02041300 |
| H | -3.49993300 | -4.49727800 | -0.50425500 |
| H | -4.02081300 | -3.29320500 | -1.67336500 |
| H | -5.30988300 | -3.74499800 | 1.07382200  |
| H | -5.83140400 | -2.54467600 | -0.09786000 |
| H | -5.86338600 | -5.59238500 | -0.56292800 |
| H | -7.27965400 | -4.58393700 | -0.22799900 |
| H | -6.38729700 | -4.38308200 | -1.74368800 |
| C | 3.86064800  | 3.20876300  | -0.26902500 |
| O | 2.94416800  | 2.36509900  | -0.03973300 |
| O | 5.05313100  | 2.99587500  | -0.51564900 |
| H | 5.61078300  | 1.07278200  | -0.36447500 |
| C | 1.07156600  | 5.85901400  | 0.17940700  |
| H | 0.68916900  | 6.82338500  | -0.17858700 |
| H | 1.09227600  | 5.89830400  | 1.27591200  |



|   |              |             |             |
|---|--------------|-------------|-------------|
| C | 0.20628500   | 4.69487700  | -0.31301500 |
| H | 0.19707400   | 4.68675500  | -1.41272200 |
| H | 0.67451500   | 3.74905300  | -0.00883400 |
| C | -1.23730100  | 4.74193000  | 0.20336000  |
| H | -1.22785800  | 4.75804900  | 1.30372700  |
| H | -1.70730900  | 5.68701700  | -0.10850300 |
| C | -2.09677500  | 3.56543800  | -0.27721500 |
| H | -2.11125300  | 3.55176400  | -1.37738400 |
| H | -1.61969200  | 2.62194100  | 0.03016100  |
| C | -3.53786000  | 3.59552800  | 0.24782800  |
| H | -4.01798500  | 4.53552300  | -0.06256400 |
| H | -3.52305000  | 3.61250600  | 1.34783500  |
| C | -4.38928300  | 2.41133900  | -0.22835900 |
| H | -3.90577800  | 1.47120200  | 0.07892600  |
| H | -4.40754200  | 2.39626700  | -1.32838600 |
| C | -5.82875200  | 2.43439000  | 0.30168300  |
| H | -6.31376300  | 3.37270200  | -0.00617200 |
| H | -5.81018500  | 2.45029800  | 1.40162200  |
| C | -6.67674500  | 1.24722000  | -0.17306800 |
| H | -6.18918700  | 0.30874400  | 0.13233200  |
| H | -6.69794700  | 1.23301700  | -1.27302200 |
| C | -8.11483300  | 1.26570600  | 0.36090100  |
| H | -8.60302100  | 2.20325400  | 0.05567300  |
| H | -8.09327900  | 1.28018300  | 1.46081900  |
| C | -8.96096300  | 0.07696000  | -0.11313700 |
| H | -8.47138700  | -0.86074500 | 0.19036700  |
| H | -8.98415100  | 0.06363800  | -1.21306500 |
| C | -10.39824800 | 0.09353500  | 0.42325400  |
| H | -10.88789300 | 1.03082700  | 0.11952400  |
| H | -10.37490500 | 0.10729700  | 1.52316200  |
| C | -11.24419200 | -1.09565300 | -0.05002200 |
| H | -10.75433500 | -2.03300600 | 0.25350900  |
| H | -11.26776200 | -1.10928800 | -1.14997400 |
| C | -12.68122600 | -1.07920200 | 0.48656100  |
| H | -13.17216300 | -0.14237500 | 0.18295500  |
| H | -12.65862600 | -1.06571500 | 1.58663900  |
| C | -13.52757000 | -2.26832000 | 0.01400000  |
| H | -13.03765200 | -3.20448500 | 0.31781800  |
| H | -13.55111400 | -2.28150900 | -1.08507200 |
| C | -14.96089800 | -2.24381400 | 0.55473800  |
| H | -15.48851400 | -1.33552600 | 0.23818000  |
| H | -15.53851900 | -3.10497000 | 0.19953100  |
| H | -14.97121700 | -2.26547300 | 1.65155800  |

\*\*\*\*\*

**The pyrolysis reaction: (Pathway A2) (Reactant, RA2)**

Basis set = 6-31+G(d)

Nuclear repulsion energy= 3032.6158347723Hartrees

E(UB3LYP) = -1482.51423738

Formula C32H62O3

Charge = 0 Multiplicity = 1

|   |          |          |          |
|---|----------|----------|----------|
| C | -1.17964 | 5.86104  | 0.04065  |
| O | -1.60987 | 6.95935  | 0.27263  |
| C | -1.9416  | 4.79161  | -0.71656 |
| C | -3.07725 | 4.19967  | 0.14511  |
| H | -1.27764 | 3.99943  | -1.0716  |
| H | -2.37451 | 5.29218  | -1.58975 |
| C | -3.95169 | 3.213    | -0.63756 |
| H | -2.63848 | 3.69142  | 1.01304  |
| H | -3.69228 | 5.02343  | 0.52858  |
| H | -4.38256 | 3.72367  | -1.5113  |
| H | -3.32197 | 2.40376  | -1.03502 |
| O | 0.09971  | 5.56316  | 0.50732  |
| C | 0.59988  | 4.27338  | 0.48549  |
| C | 1.52938  | 3.87981  | -0.38566 |
| H | 1.80813  | 4.59586  | -1.15396 |
| C | 2.22089  | 2.54538  | -0.36268 |
| C | 3.75384  | 2.66891  | -0.26976 |
| H | 1.96952  | 1.98517  | -1.27669 |
| H | 1.84474  | 1.95077  | 0.47719  |
| H | 4.11998  | 3.29006  | -1.10037 |
| H | 4.01451  | 3.20793  | 0.65145  |
| C | 4.46819  | 1.3119   | -0.2946  |
| H | 4.20113  | 0.77776  | -1.21878 |
| H | 4.09501  | 0.69038  | 0.53293  |
| C | 5.9952   | 1.42259  | -0.19617 |
| H | 6.36828  | 2.04496  | -1.02314 |
| H | 6.26124  | 1.95642  | 0.72822  |
| C | 6.71043  | 0.06549  | -0.22096 |
| H | 6.44611  | -0.46727 | -1.14663 |
| H | 6.3348   | -0.55759 | 0.60439  |
| C | 8.23731  | 0.17459  | -0.11799 |
| H | 8.61322  | 0.79803  | -0.94294 |
| H | 8.50127  | 0.70699  | 0.80795  |
| C | 8.95217  | -1.18266 | -0.14275 |
| H | 8.68964  | -1.71423 | -1.06962 |
| H | 8.57449  | -1.80667 | 0.68099  |
| C | 10.47889 | -1.07453 | -0.0364  |
| H | 10.85683 | -0.45027 | -0.85982 |
| H | 10.74123 | -0.54333 | 0.89072  |
| C | 11.19332 | -2.432   | -0.06132 |
| H | 10.932   | -2.96262 | -0.98908 |
| H | 10.81418 | -3.05667 | 0.76126  |
| C | 12.71991 | -2.32451 | 0.04735  |
| H | 13.09921 | -1.69964 | -0.77498 |
| H | 12.98114 | -1.79421 | 0.9753   |
| C | 13.43408 | -3.68211 | 0.02221  |
| H | 13.17342 | -4.21208 | -0.90614 |
| H | 13.0541  | -4.30722 | 0.84409  |
| C | 14.96046 | -3.57537 | 0.13213  |

|   |           |          |          |
|---|-----------|----------|----------|
| H | 15.22214  | -3.04601 | 1.06066  |
| H | 15.34157  | -2.95052 | -0.68957 |
| C | 15.67492  | -4.93275 | 0.10685  |
| H | 15.41448  | -5.46141 | -0.82126 |
| H | 15.2947   | -5.55703 | 0.92806  |
| C | 17.19864  | -4.81678 | 0.21754  |
| H | 17.49175  | -4.32348 | 1.1526   |
| H | 17.67859  | -5.80197 | 0.1965   |
| H | 17.61245  | -4.22704 | -0.60985 |
| C | -5.08102  | 2.60952  | 0.20767  |
| H | -5.7064   | 3.42036  | 0.60932  |
| H | -4.64734  | 2.09914  | 1.08027  |
| C | -5.96464  | 1.62426  | -0.56845 |
| H | -6.39925  | 2.13558  | -1.44021 |
| H | -5.33803  | 0.81536  | -0.97267 |
| C | -7.09194  | 1.01738  | 0.27693  |
| H | -7.71701  | 1.8267   | 0.68275  |
| H | -6.65664  | 0.50534  | 1.14802  |
| C | -7.97805  | 0.03345  | -0.49798 |
| H | -7.35274  | -0.77504 | -0.90526 |
| H | -8.41449  | 0.54601  | -1.3682  |
| C | -9.10384  | -0.57491 | 0.34838  |
| H | -8.66704  | -1.08822 | 1.21802  |
| H | -9.72819  | 0.23376  | 0.75674  |
| C | -9.99162  | -1.55772 | -0.42607 |
| H | -9.36721  | -2.36591 | -0.83535 |
| H | -10.42925 | -1.04407 | -1.29508 |
| C | -11.11636 | -2.16685 | 0.42112  |
| H | -10.67852 | -2.68115 | 1.28966  |
| H | -11.74007 | -1.35854 | 0.8312   |
| C | -12.00534 | -3.1487  | -0.35317 |
| H | -11.38164 | -3.95677 | -0.76379 |
| H | -12.44366 | -2.6342  | -1.22133 |
| C | -13.12951 | -3.75823 | 0.49448  |
| H | -12.69105 | -4.27321 | 1.36235  |
| H | -13.75277 | -2.95006 | 0.90562  |
| C | -14.01936 | -4.73936 | -0.27937 |
| H | -13.39698 | -5.54821 | -0.69083 |
| H | -14.45887 | -4.22501 | -1.1472  |
| C | -15.1434  | -5.34922 | 0.56808  |
| H | -14.70445 | -5.86397 | 1.43472  |
| H | -15.76576 | -4.54135 | 0.97879  |
| C | -16.02721 | -6.32749 | -0.21249 |
| H | -15.43899 | -7.16571 | -0.60618 |
| H | -16.81918 | -6.74491 | 0.41992  |
| H | -16.5082  | -5.83311 | -1.06561 |
| O | 0.07421   | 3.4706   | 1.45961  |
| H | -0.12137  | 4.03061  | 2.23021  |

\*\*\*\*\*

**The pyrolysis reaction: (Pathway A2) (TS2A2 )**

Basis set = 6-31+G(d)

Nuclear repulsion energy= 3017.7256284840 Hartrees

E(UB3LYP) = -1482.43148721

Formula C32H62O3

Charge = 0 Multiplicity = 1

|   |          |          |          |
|---|----------|----------|----------|
| C | -0.08844 | 1.26985  | 0.63514  |
| O | -0.1138  | 1.27294  | 1.85679  |
| C | -1.32438 | 0.98761  | -0.20578 |
| C | -2.61802 | 0.88397  | 0.60362  |
| H | -1.13472 | 0.05122  | -0.75573 |
| H | -1.39891 | 1.76197  | -0.98218 |
| C | -3.84092 | 0.56417  | -0.26489 |
| H | -2.49611 | 0.11757  | 1.37873  |
| H | -2.77995 | 1.82695  | 1.1416   |
| H | -3.95125 | 1.33538  | -1.04181 |
| H | -3.67297 | -0.38259 | -0.8004  |
| O | 0.2082   | 3.71105  | -1.45758 |
| C | 1.01983  | 3.47697  | -0.63479 |
| C | 1.19739  | 1.55218  | -0.10133 |
| H | 1.19081  | 1.21349  | -1.13952 |
| C | 2.45333  | 0.94274  | 0.62427  |
| C | 3.75489  | 1.07201  | -0.17547 |
| H | 2.2181   | -0.11698 | 0.79462  |
| H | 2.5653   | 1.37608  | 1.62575  |
| H | 3.62398  | 0.60138  | -1.16055 |
| H | 3.97238  | 2.13178  | -0.36936 |
| C | 4.95301  | 0.43319  | 0.53991  |
| H | 4.73731  | -0.62773 | 0.734    |
| H | 5.07869  | 0.90361  | 1.52586  |
| C | 6.26329  | 0.54999  | -0.24959 |
| H | 6.1367   | 0.07946  | -1.23592 |
| H | 6.47536  | 1.61157  | -0.44455 |
| C | 7.46406  | -0.08405 | 0.46444  |
| H | 7.25242  | -1.14626 | 0.65753  |
| H | 7.5874   | 0.38465  | 1.452    |
| C | 8.77658  | 0.03675  | -0.32071 |
| H | 8.65351  | -0.43198 | -1.30846 |
| H | 8.98704  | 1.09917  | -0.51392 |
| C | 9.97808  | -0.59548 | 0.39377  |
| H | 9.76848  | -1.65846 | 0.5852   |
| H | 10.09907 | -0.12818 | 1.38242  |
| C | 11.29186 | -0.47128 | -0.38874 |
| H | 11.17122 | -0.93867 | -1.37745 |
| H | 11.50083 | 0.59181  | -0.58023 |
| C | 12.49361 | -1.10238 | 0.32632  |
| H | 12.28531 | -2.16586 | 0.51655  |
| H | 12.61293 | -0.63596 | 1.31563  |
| C | 13.80814 | -0.97582 | -0.45455 |

|   |           |          |          |
|---|-----------|----------|----------|
| H | 13.68907  | -1.44233 | -1.44387 |
| H | 14.0161   | 0.08771  | -0.64481 |
| C | 15.01     | -1.60626 | 0.2609   |
| H | 14.80239  | -2.67002 | 0.45049  |
| H | 15.12836  | -1.14024 | 1.25057  |
| C | 16.32497  | -1.47863 | -0.51872 |
| H | 16.53356  | -0.41498 | -0.70846 |
| H | 16.20785  | -1.94486 | -1.50856 |
| C | 17.52708  | -2.10863 | 0.19658  |
| H | 17.31929  | -3.17157 | 0.38547  |
| H | 17.64466  | -1.64252 | 1.1853   |
| C | 18.83598  | -1.97638 | -0.58872 |
| H | 19.08906  | -0.92321 | -0.76295 |
| H | 19.67404  | -2.43548 | -0.05182 |
| H | 18.76131  | -2.46381 | -1.56873 |
| C | -5.14415  | 0.46576  | 0.53869  |
| H | -5.31166  | 1.41228  | 1.07346  |
| H | -5.03349  | -0.30515 | 1.31555  |
| C | -6.37268  | 0.14587  | -0.32265 |
| H | -6.48152  | 0.91666  | -1.10018 |
| H | -6.20528  | -0.80136 | -0.85692 |
| C | -7.67611  | 0.05016  | 0.48093  |
| H | -7.84267  | 0.99709  | 1.01571  |
| H | -7.5675   | -0.72094 | 1.25816  |
| C | -8.90575  | -0.26802 | -0.37962 |
| H | -8.73962  | -1.21533 | -0.91407 |
| H | -9.01377  | 0.50291  | -1.15715 |
| C | -10.20925 | -0.36219 | 0.42404  |
| H | -10.10152 | -1.13348 | 1.20125  |
| H | -10.37476 | 0.58491  | 0.95895  |
| C | -11.43941 | -0.67896 | -0.4363  |
| H | -11.27425 | -1.62632 | -0.97094 |
| H | -11.54674 | 0.09219  | -1.21372 |
| C | -12.74298 | -0.77203 | 0.36738  |
| H | -12.63591 | -1.54346 | 1.14455  |
| H | -12.90773 | 0.17519  | 0.90234  |
| C | -13.97339 | -1.08778 | -0.49298 |
| H | -13.80887 | -2.03518 | -1.02774 |
| H | -14.08016 | -0.31647 | -1.27031 |
| C | -15.27707 | -1.1801  | 0.31057  |
| H | -15.17046 | -1.9516  | 1.08777  |
| H | -15.44135 | -0.23275 | 0.84552  |
| C | -16.50766 | -1.4952  | -0.54946 |
| H | -16.34462 | -2.44288 | -1.08444 |
| H | -16.61521 | -0.72395 | -1.32694 |
| C | -17.8116  | -1.58715 | 0.25359  |
| H | -17.70478 | -2.35826 | 1.02991  |
| H | -17.97507 | -0.64019 | 0.78765  |
| C | -19.03524 | -1.90182 | -0.6131  |
| H | -18.91683 | -2.86066 | -1.13292 |

|   |           |          |          |
|---|-----------|----------|----------|
| H | -19.94913 | -1.96055 | -0.01081 |
| H | -19.18898 | -1.12964 | -1.37709 |
| O | 1.89857   | 3.97851  | 0.1207   |
| H | 1.8291    | 2.7304   | 0.34411  |

\*\*\*\*\*

**The pyrolysis reaction: (Pathway A2) ( Intermediate 2, I2A2)**

Basis set = 6-31+G(d)

Nuclear repulsion energy= 3052.6423025845 Hartrees

E(UB3LYP) = -1482.55143636

Formula C32H62O3

Charge = 0 Multiplicity = 1

|   |          |          |          |
|---|----------|----------|----------|
| C | -0.11066 | 3.68477  | 0.2272   |
| O | -0.33761 | 4.23725  | 1.29942  |
| C | -1.16213 | 2.86076  | -0.48411 |
| C | -2.45045 | 2.64336  | 0.31163  |
| H | -0.70558 | 1.90309  | -0.77728 |
| H | -1.37051 | 3.37211  | -1.43794 |
| C | -3.4919  | 1.82336  | -0.46016 |
| H | -2.20836 | 2.14339  | 1.25826  |
| H | -2.86933 | 3.61863  | 0.5874   |
| H | -3.72719 | 2.32961  | -1.40828 |
| H | -3.06135 | 0.84896  | -0.73579 |
| O | 2.60542  | 5.59817  | -1.23269 |
| C | 1.91613  | 5.16713  | -0.33834 |
| C | 1.26673  | 3.77292  | -0.42038 |
| H | 1.19859  | 3.52313  | -1.48331 |
| C | 2.19171  | 2.72298  | 0.27649  |
| C | 3.55107  | 2.54172  | -0.41066 |
| H | 1.66556  | 1.75831  | 0.29782  |
| H | 2.32888  | 3.02525  | 1.32232  |
| H | 3.3894   | 2.23283  | -1.45313 |
| H | 4.07431  | 3.50378  | -0.45859 |
| C | 4.43211  | 1.50606  | 0.30092  |
| H | 3.90265  | 0.54251  | 0.34779  |
| H | 4.58974  | 1.81756  | 1.344    |
| C | 5.79305  | 1.30407  | -0.37832 |
| H | 5.63512  | 0.99378  | -1.42181 |
| H | 6.32036  | 2.26789  | -0.4253  |
| C | 6.6813   | 0.27235  | 0.3289   |
| H | 6.15196  | -0.69111 | 0.3769   |
| H | 6.83906  | 0.58356  | 1.37227  |
| C | 8.04206  | 0.06903  | -0.34995 |
| H | 7.88412  | -0.24069 | -1.39379 |
| H | 8.57132  | 1.03227  | -0.39701 |
| C | 8.93091  | -0.96344 | 0.35555  |
| H | 8.40114  | -1.92667 | 0.40277  |
| H | 9.08881  | -0.65357 | 1.39936  |
| C | 10.29164 | -1.16706 | -0.32325 |

|   |           |          |          |
|---|-----------|----------|----------|
| H | 10.13366  | -1.47585 | -1.36739 |
| H | 10.82163  | -0.20406 | -0.36963 |
| C | 11.18023  | -2.20048 | 0.38122  |
| H | 10.65004  | -3.16349 | 0.42761  |
| H | 11.33819  | -1.89167 | 1.42536  |
| C | 12.54096  | -2.4042  | -0.29755 |
| H | 12.38298  | -2.71236 | -1.34189 |
| H | 13.07134  | -1.44136 | -0.34338 |
| C | 13.42926  | -3.43825 | 0.40632  |
| H | 12.89875  | -4.40114 | 0.45213  |
| H | 13.58719  | -3.13007 | 1.45069  |
| C | 14.78997  | -3.64228 | -0.272   |
| H | 15.3216   | -2.67993 | -0.31766 |
| H | 14.6331   | -3.95068 | -1.31658 |
| C | 15.67838  | -4.67649 | 0.43137  |
| H | 15.14775  | -5.63832 | 0.4764   |
| H | 15.83585  | -4.36817 | 1.47484  |
| C | 17.03515  | -4.87384 | -0.2525  |
| H | 17.60458  | -3.93656 | -0.28126 |
| H | 17.64498  | -5.6176  | 0.27317  |
| H | 16.91138  | -5.21605 | -1.28747 |
| C | -4.78833  | 1.59848  | 0.32878  |
| H | -5.21926  | 2.57273  | 0.60232  |
| H | -4.55227  | 1.09434  | 1.27748  |
| C | -5.83401  | 0.77695  | -0.43619 |
| H | -6.06881  | 1.2814   | -1.38531 |
| H | -5.40136  | -0.19696 | -0.70979 |
| C | -7.13104  | 0.55125  | 0.35156  |
| H | -7.56441  | 1.52513  | 0.62366  |
| H | -6.89579  | 0.04866  | 1.30153  |
| C | -8.17592  | -0.2727  | -0.41205 |
| H | -7.74198  | -1.24653 | -0.68396 |
| H | -8.41067  | 0.22978  | -1.36227 |
| C | -9.47335  | -0.49886 | 0.37491  |
| H | -9.23833  | -1.00002 | 1.32576  |
| H | -9.90798  | 0.47492  | 0.64565  |
| C | -10.51725 | -1.32473 | -0.38799 |
| H | -10.08232 | -2.29849 | -0.65855 |
| H | -10.75201 | -0.8237  | -1.33899 |
| C | -11.81492 | -1.55116 | 0.39852  |
| H | -11.58    | -2.0513  | 1.34995  |
| H | -12.25038 | -0.57744 | 0.66825  |
| C | -12.85807 | -2.37837 | -0.36395 |
| H | -12.42245 | -3.35209 | -0.63355 |
| H | -13.09286 | -1.87833 | -1.31547 |
| C | -14.15587 | -2.60497 | 0.42228  |
| H | -13.92096 | -3.1045  | 1.37407  |
| H | -14.59179 | -1.63123 | 0.6914   |
| C | -15.19874 | -3.43284 | -0.33952 |
| H | -14.76375 | -4.40711 | -0.6087  |

|   |           |          |          |
|---|-----------|----------|----------|
| H | -15.43461 | -2.93385 | -1.29148 |
| C | -16.49668 | -3.6597  | 0.44627  |
| H | -16.26133 | -4.15879 | 1.39717  |
| H | -16.93197 | -2.68644 | 0.71453  |
| C | -17.53226 | -4.48744 | -0.32174 |
| H | -17.13858 | -5.47995 | -0.57375 |
| H | -18.44632 | -4.63145 | 0.26573  |
| H | -17.81429 | -3.99649 | -1.26143 |
| O | 1.73345   | 5.83779  | 0.81031  |
| H | 1.03825   | 5.37438  | 1.33823  |

\*\*\*\*\*

**The pyrolysis reaction: (Pathway A2) (Product, PA2)**

Basis set = 6-31+G(d)

Nuclear repulsion energy= 3020.2941717892 Hartrees

E(UB3LYP) = -1482.56525149

Formula C32H62O3

Charge = 0 Multiplicity = 1

|   |          |          |          |
|---|----------|----------|----------|
| C | -0.02204 | -0.29424 | -0.33876 |
| O | -0.01791 | 0.57518  | -1.1861  |
| C | 1.26903  | -0.81592 | 0.26551  |
| C | 2.51767  | -0.20188 | -0.35478 |
| H | 1.27904  | -1.91126 | 0.17383  |
| H | 1.22844  | -0.61301 | 1.34556  |
| C | 3.80538  | -0.73321 | 0.26974  |
| H | 2.51545  | -0.39459 | -1.43405 |
| H | 2.4748   | 0.88975  | -0.25169 |
| H | 3.79609  | -0.5413  | 1.35208  |
| H | 3.84577  | -1.82553 | 0.15373  |
| O | 0.7179   | 3.3565   | -0.10572 |
| C | 0.23905  | 2.64051  | 0.67129  |
| C | -1.31412 | -0.88908 | 0.18728  |
| H | -1.32681 | -1.95616 | -0.07953 |
| C | -2.55834 | -0.18352 | -0.33519 |
| C | -3.84993 | -0.80737 | 0.18728  |
| H | -2.54765 | -0.19851 | -1.431   |
| H | -2.51226 | 0.87378  | -0.04671 |
| H | -3.88963 | -1.86721 | -0.10187 |
| H | -3.84831 | -0.78977 | 1.28625  |
| C | -5.10095 | -0.09781 | -0.32636 |
| H | -5.10366 | -0.11699 | -1.425   |
| H | -5.06008 | 0.96198  | -0.03896 |
| C | -6.39773 | -0.71355 | 0.19449  |
| H | -6.43837 | -1.77374 | -0.0924  |
| H | -6.39397 | -0.69378 | 1.29338  |
| C | -7.64824 | -0.00302 | -0.31907 |
| H | -7.6531  | -0.02461 | -1.41783 |
| H | -7.60605 | 1.05761  | -0.03431 |
| C | -8.94582 | -0.61514 | 0.20426  |
| H | -8.98834 | -1.67589 | -0.0802  |



|   |           |          |          |
|---|-----------|----------|----------|
| H | -8.94082  | -0.59309 | 1.30309  |
| C | -10.19583 | 0.09618  | -0.30944 |
| H | -10.20173 | 0.07268  | -1.40819 |
| H | -10.15204 | 1.15729  | -0.02659 |
| C | -11.49385 | -0.51325 | 0.21595  |
| H | -11.53803 | -1.57438 | -0.06682 |
| H | -11.48781 | -0.48957 | 1.31474  |
| C | -12.74344 | 0.19887  | -0.29765 |
| H | -12.75018 | 0.17413  | -1.39639 |
| H | -12.69832 | 1.26027  | -0.01604 |
| C | -14.04173 | -0.40861 | 0.22933  |
| H | -14.08719 | -1.46998 | -0.05233 |
| H | -14.03483 | -0.38385 | 1.32807  |
| C | -15.29107 | 0.30417  | -0.28401 |
| H | -15.29839 | 0.27868  | -1.38276 |
| H | -15.2449  | 1.36574  | -0.00313 |
| C | -16.58955 | -0.30174 | 0.24387  |
| H | -16.58288 | -0.27648 | 1.34276  |
| H | -16.63671 | -1.36343 | -0.03687 |
| C | -17.83928 | 0.41118  | -0.26902 |
| H | -17.84456 | 0.38447  | -1.36635 |
| H | -17.79023 | 1.47114  | 0.01195  |
| C | -19.12897 | -0.20466 | 0.26737  |
| H | -19.15515 | -0.16316 | 1.36147  |
| H | -20.01293 | 0.31772  | -0.10958 |
| H | -19.20994 | -1.2568  | -0.02576 |
| C | 5.06061   | -0.1144  | -0.34163 |
| H | 5.02283   | 0.97704  | -0.22056 |
| H | 5.06694   | -0.30178 | -1.42428 |
| C | 6.3531    | -0.64804 | 0.2722   |
| H | 6.34453   | -0.46453 | 1.35583  |
| H | 6.39177   | -1.73928 | 0.14691  |
| C | 7.60802   | -0.02507 | -0.33557 |
| H | 7.57123   | 1.06565  | -0.20635 |
| H | 7.61418   | -0.20447 | -1.41979 |
| C | 8.9015    | -0.56283 | 0.27273  |
| H | 8.93935   | -1.65328 | 0.14068  |
| H | 8.89437   | -0.38613 | 1.35747  |
| C | 10.15602  | 0.06316  | -0.33277 |
| H | 10.16138  | -0.11062 | -1.41796 |
| H | 10.11952  | 1.15325  | -0.19789 |
| C | 11.45007  | -0.47766 | 0.27162  |
| H | 11.4873   | -1.56755 | 0.13492  |
| H | 11.44419  | -0.30561 | 1.35711  |
| C | 12.70423  | 0.15031  | -0.33256 |
| H | 12.70894  | -0.01988 | -1.41834 |
| H | 12.66787  | 1.23997  | -0.19405 |
| C | 13.99865  | -0.39248 | 0.26927  |
| H | 14.03542  | -1.48201 | 0.12975  |
| H | 13.99369  | -0.22325 | 1.35521  |

|   |          |          |          |
|---|----------|----------|----------|
| C | 15.25259 | 0.2366   | -0.33423 |
| H | 15.25684 | 0.06834  | -1.42034 |
| H | 15.21617 | 1.32605  | -0.19379 |
| C | 16.54729 | -0.30688 | 0.26595  |
| H | 16.58465 | -1.39641 | 0.12536  |
| H | 16.54378 | -0.13911 | 1.35227  |
| C | 17.80159 | 0.32241  | -0.33721 |
| H | 17.8033  | 0.15391  | -1.42186 |
| H | 17.76265 | 1.41021  | -0.19567 |
| C | 19.08755 | -0.23042 | 0.27188  |
| H | 19.15834 | -1.31237 | 0.11752  |
| H | 19.97481 | 0.23062  | -0.17152 |
| H | 19.11771 | -0.04761 | 1.35129  |
| O | -0.23219 | 1.94089  | 1.47681  |
| H | -1.27756 | -0.85957 | 1.28499  |

.....
